# 1 Time-resolved dual root-microbe transcriptomics reveals early 2 induced *Nicotiana benthamiana* genes and conserved infection- 3 promoting *Phytophthora palmivora* effectors

4 Edouard Evangelisti\* (1) ([edouard.evangelisti@slcu.cam.ac.uk](mailto:edouard.evangelisti@slcu.cam.ac.uk))

5 Anna Gogleva\* (1) ([anna.gogleva@slcu.cam.ac.uk](mailto:anna.gogleva@slcu.cam.ac.uk))

6 Thomas Hainaux (1, 2) ([thomas.hainaux@ulb.ac.be](mailto:thomas.hainaux@ulb.ac.be))

7 Mehdi Doumane (1, 3) ([mehdi.doumane@ens-lyon.fr](mailto:mehdi.doumane@ens-lyon.fr))

8 Frej Tulin (1) ([frej.tulin@slcu.cam.ac.uk](mailto:frej.tulin@slcu.cam.ac.uk))

9 Clément Quan (1) ([clement.quan@slcu.cam.ac.uk](mailto:clement.quan@slcu.cam.ac.uk))

10 Temur Yunusov (1) ([temur.yunusov@slcu.cam.ac.uk](mailto:temur.yunusov@slcu.cam.ac.uk))

11 Kevin Floch (1) ([floch.kevin@laposte.net](mailto:floch.kevin@laposte.net))

12 Sebastian Schornack (1, 4) ([sebastian.schornack@slcu.cam.ac.uk](mailto:sebastian.schornack@slcu.cam.ac.uk); +44 1223761145)

13 (\*) These authors contributed equally

14 (1) Sainsbury Laboratory Cambridge University (SLCU), Cambridge (United Kingdom)

15 (2) Present address: Université Libre de Bruxelles (Bruxelles, Belgium)

16 (3) Present address: École Normale Supérieure de Lyon (Lyon, France)

17 (4) Author for correspondence

18 7 Figures, 2 tables, 12 supporting figures, 4 supporting tables

# 1 Abstract

2 **Background.** Plant-pathogenic oomycetes are responsible for economically important losses on  
3 crops worldwide. *Phytophthora palmivora*, a broad-host-range tropical relative of the potato late  
4 blight pathogen, causes rotting diseases in many important tropical crops including papaya, cocoa,  
5 oil palm, black pepper, rubber, coconut, durian, mango, cassava and citrus.

6 Transcriptomics have helped to identify repertoires of host-translocated microbial effector proteins  
7 which counteract defenses and reprogram the host in support of infection. As such, these studies  
8 have helped understanding of how pathogens cause diseases. Despite the importance of  
9 *P. palmivora* diseases, genetic resources to allow for disease resistance breeding and identification  
10 of microbial effectors are scarce.

11 **Results.** We employed the model plant *N. benthamiana* to study the *P. palmivora* root infections at  
12 the cellular and molecular level. Time-resolved dual transcriptomics revealed different pathogen  
13 and host transcriptome dynamics. *De novo* assembly of *P. palmivora* transcriptome and semi-  
14 automated prediction and annotation of the secretome enabled robust identification of conserved  
15 infection-promoting effectors. We show that one of them, REX3, suppresses plant secretion  
16 processes. In a survey for early transcriptionally activated plant genes we identified a  
17 *N. benthamiana* gene specifically induced at infected root tips that encodes a peptide with danger-  
18 associated molecular features.

1 **Conclusions.** These results constitute a major advance in our understanding of *P. palmivora*  
 2 diseases and establish extensive resources for *P. palmivora* pathogenomics, effector-aided resistance  
 3 breeding and the generation of induced resistance to *Phytophthora* root infections. Furthermore, our  
 4 approach to find infection relevant secreted genes is transferable to other pathogen-host interactions  
 5 and not restricted to plants.

6 **250 words**

## 7 **Keywords**

8 Dual transcriptomics, effectors, RXLR-effectors, secretome, *de novo* transcriptome assembly,  
 9 *N. benthamiana*, *P. palmivora*, non-model species

# 1 Background

2 *Phytophthora* is a genus of plant-pathogenic oomycetes responsible for economically important  
 3 losses on crops worldwide, as well as damage to natural ecosystems [1]. *Phytophthora infestans* is  
 4 the causal agent of tomato and potato late blight in temperate climates and contributed to major crop  
 5 losses during the Great Irish Famine [2]. *Phytophthora palmivora*, a broad-host-range tropical  
 6 relative of *P. infestans* originating from south-eastern Asia [3] but now present worldwide due to  
 7 international trade [4] causes root, bud and fruit rotting diseases in many important tropical crops  
 8 such as papaya, cocoa, oil palm, black pepper, rubber, coconut, durian, mango, cassava and citrus  
 9 [5–8]. In addition, *P. palmivora* infects roots and leaves of several model plant species such as  
 10 *Medicago truncatula* [9], *Hordeum vulgare* [10] and *Arabidopsis thaliana* [11]. Despite its  
 11 economic impact and widespread distribution, nothing is known about the molecular basis  
 12 underlying its ability to infect many unrelated host species and the root responses associated with an  
 13 infection.

14 *P. palmivora* has a hemibiotrophic lifestyle. Similar to other *Phytophthora* species, its asexual life  
 15 cycle in plants is characterised by adhesion of mobile zoospores to the host tissue, encystment and  
 16 germ tube formation [12]. Entry into the plant is achieved *via* surface appressoria and is followed  
 17 by establishment of an apoplastic hyphal network. During this biotrophic stage *P. palmivora*  
 18 projects haustoria into plant cells. These contribute to acquisition of nutrients and release virulence  
 19 proteins known as effectors [13]. This is followed by a necrotrophic stage characterised by host  
 20 tissue necrosis and the production of numerous sporangia which release zoospores [14].

21 Sequencing of *Phytophthora* genomes and transcriptomes has revealed repertoires of effector  
 22 proteins that counteract plant defenses and reprogram the host in support of infection. Secretome  
 23 predictions and subsequent evolutionary and functional studies have helped to understand how these



1 pathogens cause diseases [15,16]. Oomycete effectors are secreted into the apoplast of infected  
 2 plants. Some of them act inside plant cells and conserved RXLR or LFLAK amino acid motifs in  
 3 their N-terminal parts have been associated with their translocation from the microbe into the host  
 4 cell [17,18]. The LFLAK motif is present in Crinkler (CRN) effectors, named after a crinkling and  
 5 necrosis phenotype caused by some CRN proteins when expressed in plants [19]. RXLR effectors  
 6 are usually short proteins with little similarity to conserved functional domains in their C-termini.  
 7 They localise to diverse subcellular compartments and associate with plant target proteins with key  
 8 roles during infection [20].

9 Recent studies on bacterial and oomycete plant pathogens identified subsets of effectors that are  
 10 conserved among a large number of strains. These so-called core effectors are responsible for a  
 11 substantial contribution to virulence and thus cannot be mutated or lost by the pathogen without a  
 12 significant decrease in virulence [21]. Thus, core effectors constitute highly valuable targets for  
 13 identification of resistant germplasm and subsequent breeding disease-resistant crops [21–23]. To  
 14 date, the occurrence of such core effectors in oomycetes has largely been reported from plant  
 15 pathogens with narrow economical host range such as *Hyaloperonospora arabidopsidis*,  
 16 *Phytophthora sojae* [24] and *P. infestans* [25].

17 Plants have evolved a cell autonomous surveillance system to defend themselves against invading  
 18 microbes [26]. Surface exposed pattern recognition receptors (PRRs) recognize conserved microbe-  
 19 associated molecular patterns (MAMPs) released during infection, such as the *Phytophthora*  
 20 transglutaminase peptide pep-13 [27,28]. In addition, plants are also able to recognize self-derived  
 21 so-called damage-associated molecular patterns (DAMPs). These include intracellular peptides that  
 22 get released in the apoplast upon wounding, such as systemins [29] and secreted plant peptides  
 23 precursors with DAMP features that get processed in the apoplast [30–32]. Pathogen recognition

1 initiates basal defense responses which include activation of structural and biochemical barriers, the  
 2 MAMP-triggered immunity (MTI) [26]. Plant pathogens are able to overcome MTI by secreting  
 3 effectors that suppress or compromise MTI responses, thereby facilitating effector-triggered  
 4 susceptibility (ETS). In response, plants have evolved disease resistance proteins to detect pathogen  
 5 effectors or effector-mediated modification of host processes, leading to effector-triggered  
 6 immunity (ETI) [26]. *Phytophthora* genes encoding effectors which trigger a resistance response in  
 7 host plants carrying the cognate disease resistance gene are often termed avirulence (AVR) genes.  
 8 Cross-species transfer of PRRs and disease resistance genes against conserved MAMPs or AVR  
 9 proteins has been successfully employed to engineer resistant crops [33,34].

10 Host cell responses to oomycete infections have mainly been studied in aboveground tissues and  
 11 notably involve subcellular rearrangements of the infected cells, including remodelling of the  
 12 cytoskeleton [14,35,36] and focal accumulation of secretory vesicles [37,38], which contribute to  
 13 defense by delivering antimicrobial compounds to the extrahaustorial matrix [39,40]. Endocytic  
 14 vesicles accumulate around oomycete haustoria [41] and the plant-specific small GTPase RAB5 is  
 15 recruited at the extrahaustorial membrane during *Arabidopsis* infection by obligate biotrophs [42].  
 16 Several oomycete effectors target different stages of the host secretory pathway. In the apoplast,  
 17 pathogen-secreted inhibitors have been associated with defense suppression. For instance, the  
 18 apoplastic effector GIP1 from *P. sojae* inhibits the soybean endoglucanase EGaseA [43]. The  
 19 *P. infestans* Kazal-like protease inhibitors EPI1 [44] and EPI10 [45] inhibit the *Solanum*  
 20 *lycopersicum* defense protease P69B. The cystatin-like protease inhibitors EPIC1 and EPIC2B  
 21 inhibit the cysteine proteases PIP1 (*Phytophthora* Inhibited Protease 1) [46] and Rcr3 [47] as well as  
 22 the papain-like protease C14 [48]. Interestingly, expression of the *P. infestans* RXLR effector  
 23 AVRblb2 in plant cells prevents C14 protease secretion and causes an accumulation of protease-  
 24 loaded secretory vesicles around haustoria [49].

1 In this study, we employ the model plant *N. benthamiana* [50] to study root infection by  
2 *P. palmivora*. Dual transcriptomics and *de novo* assembly of the *P. palmivora* transcriptome allowed  
3 us to define pathogen and plant genes expressed during the interaction. We identified major shifts in  
4 pathogen gene expression dynamics associated with lifestyle changes which, interestingly, are not  
5 mirrored by dramatic shifts in plant gene expression patterns. We characterised two conserved  
6 RXLR effectors, REX2 and REX3 that promote root infection upon expression in plants. We  
7 furthermore show that REX3 was able to interfere with host secretion. By studying host  
8 transcriptional changes upon infection we identified a gene encoding a secreted peptide precursor  
9 with potential DAMP motifs whose promoter was specifically activated at root tip infection sites.  
10 Hence, our work establishes a major resource for root-pathogen interactions, showcases examples  
11 of how to exploit these data, and provides inroads for effector-aided resistance breeding in tropical  
12 crops.

# 1 Results

## 2 *Phytophthora palmivora* exerts a hemibiotrophic lifestyle in *Nicotiana benthamiana* roots

3 To describe the infection development of the root pathogen *P. palmivora* we investigated the  
 4 infection dynamics of hydroponically grown *N. benthamiana* plants root-inoculated with  
 5 *P. palmivora* LILI-YKDEL [9] zoospores (**Figure 1**). Disease development was followed on the  
 6 aerial parts (**Figure 1a**) since infected roots did not display visible disease symptoms. The plants  
 7 looked healthy for up to 3 days (Symptom Extent Stage 1, SES 1). Disease progression in the aerial  
 8 parts then resulted in a shrunken, brown hypocotyl and wilting of the oldest leaves (SES 2). This  
 9 was rapidly followed by brown coloration and tissue shrinkage of the stem (SES 3) up to the apex  
 10 (SES 4). Infected plants eventually died within 8 to 10 days (SES 5), indicating that  
 11 *N. benthamiana* is susceptible to root infection by *P. palmivora* (**Figure 1a**) .

12 We next characterised the *P. palmivora* – *N. benthamiana* interaction on the microscopic level using  
 13 the fluorescently labeled isolate LILI-YKDEL (**Figure 1b-h**). Infection events were observed at 3  
 14 hours after inoculation (hai). Zoospores were primarily attracted to root tips, where they encysted  
 15 and germinated. Appressoria were differentiated at this stage and, when infection of the first cell  
 16 had already occurred, an infection vesicle and subjacent nascent hyphae were also observed (**Figure**  
 17 **1b**). Haustoria were visible from 6 hai - 24 hai, indicative of biotrophic growth (**Figure 1c-e**). At 18  
 18 hai, *P. palmivora* hyphae grew parallel to the cell files in the root cortex, forming a clear  
 19 colonisation front between infected and non-infected tissues. In addition, extraradical hyphal  
 20 growth was observed near the root tip (**Figure 1d**). First sporangia occurred at 30 hai (**Figure 1f**).  
 21 Consistent with the symptoms observed on aerial parts, hypocotyl colonization occurred between 30  
 22 hai and 48 hai (**Figure 1g**). Finally, the presence of empty or germinating sporangia at 72 hai

1 suggests possible secondary infections (**Figure 1h**). Therefore, *P. palmivora* asexual life cycle  
2 completes within 72 hai in *N. benthamiana* roots.

3 We supported our microscopic studies with biomass quantification based on transcript levels of the  
4 *P. palmivora* 40S ribosomal protein S3A (WS21) (**Figure 1i**). We further characterized the different  
5 stages observed microscopically by quantifying expression of the *P. infestans* orthologs of *Hmp1*  
6 (haustorium-specific membrane protein) [51] (**Figure 1j**) and the cell-cycle regulator *Cdc14* [52]  
7 (**Figure 1k**). *Hmp1* transcripts peaked between 3 hai and 6 hai and then decreased at later stages.  
8 By contrast, *Cdc14* transcripts increased at late time points (48 hai and 72 hai). Taken together,  
9 these results further support the conclusion that *P. palmivora* exerts a hemibiotrophic lifestyle in  
10 *N. benthamiana* roots.

# 11 ***De novo* assembly of *P. palmivora* transcriptome from mixed samples**

12 We performed dual sequencing permitting *de novo* assembly of a *P. palmivora* transcriptome as well  
13 as an assessment of transcriptional changes in both, host and pathogen over time. We extracted  
14 RNA from infected and uninfected *N. benthamiana* roots at six time points matching the key steps  
15 of the interaction identified by microscopy: 6 hai, 18 hai, 24 hai, 30 hai, 48 hai and 72 hai and an  
16 axenically grown *P. palmivora* sample containing mycelia and zoospores (MZ). Using Illumina  
17 HiSeq 2500 paired-end sequencing we obtained a relatively uniform read depth of 50-60 M reads  
18 per sample (**Table S1**). To cover all possible transcripts we reconstructed the *P. palmivora*  
19 transcriptome *de novo*, combining *ex planta* and *in planta* root samples as well as 76 nt Illumina  
20 paired-end reads from infected *N. benthamiana* leaf samples (more than 515 M reads, **Figure 2a**,  
21 **Table S1**).

1 Following standard adaptor trimming and read quality control, we applied a two-step filtering  
2 procedure (**Figure 2a**) to separate pathogen reads from plant host reads. First we mapped the pooled  
3 read dataset to the *N. benthamiana* reference genome and collected unmapped read pairs.  
4 Recovered reads were subsequently mapped to the *N. benthamiana* transcriptome [53]. Reads not  
5 mapped to either host plant genome or transcriptome were used to run assemblies. Short reads (<60  
6 nt) were filtered out to produce transcripts of better quality and coherence. Final *de novo* Trinity  
7 assemblies were run from 190 M pre-processed, properly paired and cleaned reads (**Table S1**). This  
8 yielded 57'579 'trinity genes' corresponding to 100'303 transcripts with an average backwards  
9 alignment rate of 76%, indicative of an overall acceptable representation of reads and therefore  
10 reasonably good assembly quality [54]. 9'491 trinity genes (20'045 transcripts including all  
11 isoforms) were removed by additional checks for residual plant contamination, resulting in a final  
12 *P. palmivora* transcriptome of 48'089 trinity genes corresponding to 80'258 transcripts (**Table 1**).  
13 We further selected 13'997 trinity genes (corresponding to 27106 transcripts) having the best  
14 expression support (**Supplementary Dataset 1**).  
15 We assessed completeness of *P. palmivora* assembly by benchmarking nearly universal single-copy  
16 orthologs (BUSCO) [55] (**Table 1**) and compared to the BUSCO content of *P. infestans*, *P. sojae*  
17 and *P. parasitica* transcriptomes. We identified 326 BUSCO genes (76% of eukaryotic BUSCO  
18 genes) in our *P. palmivora* assembly, 348 (81%) in *P. infestans*, 343 (80%) in *P. sojae* and 360  
19 (84%) in *P. parasitica*. (**Table 1, Supplementary Figure 1**). We also surveyed 14 publicly available  
20 *Phytophthora* genomes, yielding 20 additional BUSCO genes absent from all transcriptomes.  
21 Interestingly, the remaining 35 BUSCO genes were consistently missing from all analysed  
22 *Phytophthora* genomes and transcriptomes (**Supplementary Table 2**). These results suggest that  
23 our *P. palmivora* (LILI) transcriptome assembly actually contained 87% of BUSCO genes occurring  
24 in *Phytophthora*. Hence, our assembly shows acceptable quality and integrity and can be used as a  
25 reference for further studies.

1 **Table 1. *De novo* transcriptome assembly statistics for *P. palmivora***

| Metric                                              | Value      |
|-----------------------------------------------------|------------|
| <b>General assembly stats</b>                       |            |
| Total trinity 'genes'                               | 48'088     |
| Total trinity transcripts                           | 80'258     |
| Percent GC                                          | 48.27      |
| Smallest contig                                     | 201        |
| Largest contig                                      | 217'111    |
| <b>Stats based on all transcript contigs:</b>       |            |
| Contig N10                                          | 6'335      |
| Contig N20                                          | 4'510      |
| Contig N30                                          | 3'443      |
| Contig N40                                          | 2'621      |
| Contig N50                                          | 1'978      |
| Median contig length                                | 282        |
| Average contig length                               | 788        |
| Total assembled bases                               | 63'247'196 |
| <b>Stats based on the longest isoform per gene:</b> |            |
| Contig N10                                          | 6'738      |
| Contig N20                                          | 4'702      |
| Contig N30                                          | 3'604      |
| Contig N40                                          | 2'724      |
| Contig N50                                          | 2'003      |
| Median contig length                                | 273        |
| Average contig length                               | 765        |
| Total assembled bases                               | 36'825'977 |
| <b>Eukaryotic BUSCO genes</b>                       |            |
| Complete single-copy BUSCOs                         | 256        |
| Complete duplicated BUSCOs                          | 40         |
| Fragmented BUSCOs                                   | 30         |
| Missing BUSCOs                                      | 103        |
| Total BUSCO groups searched                         | 429        |
| Total BUSCO genes recovered                         | 326 (76%)  |
| <i>Phytophthora</i> BUSCOs                          | 374        |
| Updated % recoverable BUSCOs                        | 87         |

# 1 Clustering of plant and pathogen samples reflects different temporal dynamics during 2 infection

3 To explore temporal expression dynamics of plant and pathogen genes we separately mapped initial  
4 reads back to the reference *N. benthamiana* transcriptome (<https://solgenomics.net/>) as well as to  
5 our *P. palmivora* transcriptome assembly (**Supplementary dataset 2, Supplementary dataset 3**).  
6 Principal component analysis (PCA) of plant samples revealed a major difference between infected  
7 and uninfected samples (91% of variance; **Figure 3a**). Plant transcript profiles from infected  
8 samples could be further assigned into three groups: 6 hai; 18-24-30 hai; and 48-72 hai (4% of  
9 variance; **Figure 3a**). Conversely, PCA analysis of *P. palmivora* transcript profiles identified two  
10 groups corresponding to early infection (6 to 24 hai) and late infection with MZ (48 and 72 hai),  
11 while 30 hai was kept apart (66% of variance; **Figure 3b**). Taken together, these results suggest  
12 different behaviour of plant and pathogen transcript profiles at the same times post infection.

13 We identified 6590 plant and 2441 pathogen differentially expressed genes (DEGs) by performing  
14 differential expression analysis ( $LFC \geq 2$ ,  $FDR\ p < 10^{-3}$ ) on all possible sample pairs (**Figure 3e, f**,  
15 **Figure S3**). Hierarchical clustering revealed 236 *P. palmivora* genes upregulated exclusively during  
16 biotrophy (from 6 to 30 hai), while all other stages shared sets of induced and expressed genes  
17 (**Figure 3f, d**). Interestingly, major shifts in expression patterns occurred at 30 hai. Taken together  
18 with PCA grouping, this result suggest that 30 hai represents a transition stage from a biotrophic to  
19 a necrotrophic lifestyle.

20 In contrast to the pathogen, the plant transcriptome did not undergo sharp transitions over time and  
21 was instead characterised by steady up- or downregulation (**Figure 3e, c**). Therefore, we utilised  
22 repeated upregulation of a gene in at least two timepoints as selective criterion to alleviate the  
23 absence of replicates resulting in 2'078 up and 2'054 downregulated genes. From these we  
24 validated 5 out of 6 genes with low or no expression under control conditions and high expression  
25 levels during infection using qRT-PCR (**Figure S10**). GO term analysis revealed that upregulated



1 genes are enriched in biological processes related to hormone metabolism, abiotic stress (including  
2 oxidative stress, response to heat and wounding), defense, biosynthesis, transport, regulation of  
3 transcription and protein modification by phosphorylation and ubiquitination (**Supplementary**  
4 **Dataset 4**). Notably, we detected upregulation of numerous ethylene-responsive transcription  
5 factors (ERFs), indicating reprogramming of stress-specific defense regulation. Representatives of  
6 significantly enriched GO categories relevant for defense response include genes encoding  
7 endopeptidase inhibitors, such as Kunitz-type trypsin inhibitors. We also found upregulation of 48  
8 genes encoding O-glycosyl hydrolases. In addition, we detected upregulation of trehalose  
9 biosynthesis pathway genes. Conversely, down-regulated genes showed overall enrichment in  
10 biological processes associated with photosynthesis, cellulose biosynthesis and cell division. Taken  
11 together, these results suggest that infected *N. benthamiana* roots undergo major transcriptional and  
12 post-translational reprogramming leading to an overall activation of stress and defense responses.

### 13 ***P. palmivora* secretome prediction and annotation identifies a set of effector candidate genes**

14 Pathogen-secreted effectors and hydrolytic enzymes are hallmarks of *Phytophthora* infection [56].  
15 Therefore, we probed our *P. palmivora* transcriptome for transcripts encoding secreted proteins. A  
16 TransDecoder-based search for candidate open reading frames (ORFs) [57] identified 123'528  
17 ORFs from predicted trinity genes (isoforms included). We then analyzed the predicted ORFs using  
18 an automated pipeline for secretome prediction (**Figure 2b**) building on existing tools [58–60]. The  
19 pipeline was designed to predict signal peptides and cellular localisation with thresholds specific for  
20 oomycete sequences [61,62] and to exclude proteins with internal transmembrane domains and/or  
21 an endoplasmic reticulum (ER) retention signal. We identified 4'163 ORFs encoding putative  
22 secreted proteins.

23 Partial translated ORFs which were not predicted as secreted were subjected to an additional  
24 analysis (M-slicer) (**Figure 2b**) and resubmitted to the secretome prediction pipeline. This improved  
25 procedure allowed us to rescue 611 additional ORFs encoding putative secreted proteins. In total,

1 we identified 4'774 ORFs encoding putative secreted *P. palmivora* proteins. We further selected a  
 2 single representative secreted ORF for genes with sufficient expression support ( $\text{TPM} \geq 1$  in 3 or  
 3 more samples). This yielded 2'028 *P. palmivora* genes encoding putative secreted proteins  
 4 (**Supplementary Dataset 5**).

5 To maximise functional annotation of the *P. palmivora* secretome we used an integrative approach  
 6 (**Figure 2c**) tailored to the use of known short motifs characteristic of oomycete secreted proteins.  
 7 The pipeline contains three major blocks. The first block integrated all the sequence information,  
 8 assignment to 2'028 non-redundant genes encoding secreted proteins as well as expression data.  
 9 The second block combines results of homology searches, for both full-length alignments (blastn  
 10 and blastx) and individual functional domains (InterProScan). The third block was designed to  
 11 survey for known oomycete motifs and domains (such as RXLR, EER, WY for RXLR-effectors;  
 12 LXLFLAK for crinklers and NLS for effectors in general). The pipeline produced an initial  
 13 secretome annotation (**Figure 2c**) which was then manually curated to avoid conflicting  
 14 annotations. This strategy allowed us to assign a functional category to 768 (38 %) of predicted  
 15 secreted proteins (**Table 2**).

16 Amongst predicted cytoplasmic effectors the most prominent category encompasses 140 RXLR  
 17 effectors. Of these 123 have a conserved RXLR motif followed by dEER motif. WY-domains were  
 18 found in 30 RXLR-EER effectors and 3 RXLR effectors. Some RXLR effectors are unusually long  
 19 ( $> 400$  a.a; average length of RXLR effectors being 204 aa) suggesting multiple effector domains  
 20 linked together. For instance, the effector domain of PLTG\_07082 consisted of 8 internal repeats of  
 21 a WY-domain. It remains to be tested whether multiple WY domains within one effector fulfil  
 22 different and independent roles.

23 PFAM searches revealed one full length RXLR effector protein (PLTG\_09049) carrying a C-  
 24 terminal NUDIX domain. PFAM predictions assigned to partial genes identified two putative

1 effectors bearing a NUDIX domain PF00293 (PLTG\_05400) and a MYB/SANT domain PF00249  
2 (PLTG\_06121).

3 Sequence similarity searches for RXLR effectors matching known oomycete avirulence proteins  
4 revealed PLTG\_13552 as being similar to *P. infestans* AVR3a (PiAVR3a) (**Supplementary Figure**  
5 **2**). Notably, *P. palmivora* AVR3a (PLTG\_13552) harbours the K80/I103 configuration, but  
6 combined with a terminal valine instead of a tyrosine in PiAVR3a [63]. It thus remains to be tested  
7 whether PLTG\_13552 is capable of triggering a *R3a*-mediated hypersensitive response.

8 Our pipeline only identified 3 genes encoding putative CRN effectors (PLTG\_06681, PLTG\_02753,  
9 PLTG\_03744). Crinklers often lack predictable signal peptides, but instead might be translocated  
10 into plant cells by an alternative mechanism [64]. An independent survey using HMM-prediction  
11 without prior signal peptide prediction revealed a total of 15 CRN motif-containing proteins.  
12 Notably, the putative CRN effector PLTG\_06681 carries a C-terminal serine/threonine kinase  
13 domain (PF00069) and shows low sequence similarity (34%) to *P. infestans* effector CRN8 [65].

14 The *P. palmivora* secretome also contained a substantial number of apoplastic effectors (**Table 2**).  
15 We identified 28 genes encoding extracellular protease inhibitors, including extracellular serine  
16 protease inhibitors (EPI) with up to five recognisable Kazal domains, several cystatins and cysteine  
17 protease inhibitors (EPICs) (**Supplementary Dataset 5**). PLTG\_05646 encodes a cathepsin  
18 protease inhibitor domain followed by a cysteine protease and an ML domain (PF02221, MD-2-  
19 related lipid recognition domain). We also identified 28 proteins with small cysteine rich (SCR)  
20 signatures, 18 of them being encoded in full-length ORFs, but only six where the mature peptide is  
21 shorter than 100 aa. Longer SCRs can harbour tandem arrangements (PLTG\_08623). In one case an  
22 SCR is linked to a N-terminal PAN/APPLE domain, which is common for carbohydrate-binding  
23 proteins [66].

24 Additionally the *P. palmivora* secretome contains 90 proteins carrying potential MAMPs, including  
25 necrosis-inducing proteins (NLPs), elicitors and lectins. Out of 24 NLPs, four (PLTG\_05347,

1 PLTG\_07271, PLTG\_13864, PLTG\_01764) carry a pattern of 20 amino acid residues which is  
2 similar to the immunogenic nlp20 motif (AiMYySwyFPKDSPVTGLGHR, less conserved amino  
3 acids in lower case) [67]. Transcripts encoding elicitors and elicitors in the *P. palmivora* secretome  
4 belong to the group of highest expressed ones during infection (**Supplementary Dataset 5**). We  
5 identified six transglutaminases, five of them (PLTG\_04342, PLTG\_02581, PLTG\_10032,  
6 PLTG\_10034 and PLTG\_10033) carrying a conserved pep13-motif [28].  
7 Taken together, *de novo* transcriptome assembly followed by multistep prediction of ORF encoding  
8 potentially secreted proteins and a semi-automated annotation procedure allowed us to identify all  
9 major classes of effectors characteristic to oomycetes as well as *P. palmivora*-specific effectors with  
10 previously unreported domain arrangements. Our data suggest that *P. palmivora*'s infection strategy  
11 relies on a diverse set of extracellular proteins many of which do not match to previously  
12 characterised effectors.

**Table 2. Representation of classes putative extracellular proteins in *P. palmivora* secretome (strain LILI)**

| Functional category                      | Number of proteins |
|------------------------------------------|--------------------|
| <b>Effectors and effector candidates</b> | <b>224</b>         |
| RXLR effectors                           | 140                |
| RXLR-EER with WY domain                  | 30                 |
| RXLR-EER                                 | 93                 |
| RXLR with WY domain                      | 3                  |
| RXLR only                                | 14                 |
| Crinklers                                | 15                 |
| Protease inhibitors (EPI)                | 28                 |
| NLP                                      | 24                 |
| Repeat-containing proteins               | 17                 |
| <b>Elicitins/Elicitors</b>               | <b>42</b>          |
| <b>Lectins including CBEL</b>            | <b>25</b>          |
| <b>SCR</b>                               | <b>28</b>          |
| <b>CWDE</b>                              | <b>143</b>         |
| glycosyl hydrolase                       | 80                 |
| pectate lyase                            | 16                 |
| pectin esterase                          | 8                  |
| cellulase                                | 6                  |
| glucosidase                              | 4                  |
| polysaccharide lyase                     | 3                  |
| other                                    | 26                 |
| <b>Cutinase</b>                          | <b>3</b>           |
| <b>Protease</b>                          | <b>59</b>          |
| serine protease                          | 27                 |
| cysteine protease                        | 12                 |
| metalloendopeptidase                     | 8                  |
| aspartyl protease                        | 4                  |
| other                                    | 8                  |
| <b>Oxidase</b>                           | <b>45</b>          |
| <b>Kinase</b>                            | <b>41</b>          |
| <b>Other enzymes</b>                     | <b>158</b>         |
| <b>Hypothetical</b>                      | <b>1260</b>        |

# 1 Most differentially expressed secreted proteins have their highest expression during biotrophy

2 In order to highlight dynamic expression changes of *P. palmivora* genes during infection, we  
3 performed fuzzy clustering of *P. palmivora* DEGs (**Figure 4**) to lower sensitivity to noisy  
4 expression signals and to distinguish between expression profiles, even if they partially overlapped  
5 [68]. We identified 12 expression clusters falling into four main groups according to their temporal  
6 expression level maximum (**Figure 4a**). Group A was composed of 2 clusters containing genes  
7 down-regulated during infection. By contrast, expression levels of genes from group B peaked  
8 during biotrophy (6-24 hai). Group C was composed of 2 clusters of genes for which transcripts  
9 accumulated mostly at 30 hai, while group D was formed of four clusters of genes with maximum  
10 expression during necrotrophy (48, 72 hai). Group B showed an overall enrichment in all classes of  
11 genes encoding secreted proteins (**Figure 4b**) while groups A and C were enriched in elicitor-  
12 encoding genes. SCRs were enriched in group D. Also in group D and characterised by strong  
13 transcriptional induction was a gene (PLTG\_02529) encoding several repetitions of an unknown  
14 *Phytophthora*-specific amino acid motif. Expression dynamics of 18 *P. palmivora* genes from  
15 different clusters were validated by qRT-PCR. Fourteen genes displayed expression patterns  
16 consistent with the results of *in silico* prediction (**Figure S4b-o**). Taken together, these results  
17 suggest that *P. palmivora* transcriptome dynamics reflect the main lifestyle transitions observed by  
18 microscopic analysis of the infection process, and that a major upregulation of secreted proteins  
19 occurs during biotrophy in agreement with the occurrence of haustoria, which are a major site for  
20 pathogen secretion [13].

## 1 Conserved RXLR effectors among *P. palmivora* isolates confer enhanced plant susceptibility to 2 root infection

3 We next focussed on the characterisation of four RXLR effectors upregulated during infection  
4 (**Figure S4**) and named them *REX1* (PLTG\_01927; GenBank accession KX130348), *REX2*  
5 (PLTG\_00715; GenBank accession KX130350), *REX3* (PLTG\_00687; GenBank accession  
6 KX130351) and *REX4* (PLTG\_13723; GenBank accession KX130352). *REX1-4* sequences from  
7 *P. palmivora* isolates with diverse geographic and host species origin (**Table S4**) were obtained by  
8 PCR and amplicon sequencing. Primers specific for *REX1-4* generated amplicons from at least 13  
9 of the 18 isolates (*REX1*: 15, *REX2*: 15, *REX3*: 16, *REX4*: 13, **Figure S5**) encoding proteins with  
10 high levels of amino acid sequence conservation. In particular *REX2* and *REX3* were almost  
11 invariant, with one and two amino acid substitutions, respectively (**Figure S6**).

12 N-terminal translational GFP fusions of FLAG-tagged *REX* coding sequences (referred to as  
13 GFP:FLAG-*REX1-4*) expressed in roots of stable transgenic *N. benthamiana* plants (**Figure 5**,  
14 **Figure S7**) or transiently in the leaf epidermis (**Figure S8a-d**) showed nuclear and cytoplasmic  
15 fluorescence at 24 hai originating from expression of full length GFP:FLAG-*REX1,2* and *REX4*  
16 protein fusions (**Figure S8e**). In contrast to the other three, GFP:FLAG-*REX3* fluorescence signals  
17 were much weaker in the leaf epidermis nucleus compared the cytoplasmic signals and absent from  
18 root nuclei (**Figure 5c**, **Figure S8c**).

19 To determine the contribution of *REX1-4* to *N. benthamiana* root infection, we then challenged  
20 hydroponically grown transgenic plants expressing GFP:FLAG-*REX1-4* or GFP16c-expressing  
21 plants (ER-targeted GFP) with *P. palmivora* zoospores (**Figure 6a,b**) and monitored disease  
22 progression into aerial tissues over time using a disease index ranking from 1 to 5 derived from the  
23 symptoms previously reported (**Figure 1**). Transgenic plants expressing GFP:FLAG fusions of the  
24 highly conserved *REX2* and *REX3* effectors displayed significantly accelerated disease symptom  
25 development (*P*-values of 5.4 10<sup>-16</sup> and 0.013, respectively) compared to GFP16c control plants,

1 while expression of GFP:FLAG-REX1 and GFP:FLAG-REX4 did not enhance susceptibility (*P*-  
2 values of 0.66 and 0.24, respectively) (**Figure 6a,b**).

### 3 **REX3 impairs plant secretion processes**

4 Suppression of defense component secretion has previously been found to be targeted by at least  
5 two mechanisms [48,49]. We thus investigated the ability of the infection promoting REX2 and  
6 REX3 effectors to suppress host secretion (**Figure 6c**). We generated pTrafficLights, a vector which  
7 enables expression of a secreted GFP (SPPR1-GFP) together with a nuclear-cytoplasmic DsRed  
8 from the same *A. tumefaciens* T-DNA (**Figure S9a**) and performed *A. tumefaciens*-mediated  
9 transient expression assays in *N. benthamiana* leaves using the same conditions as Bartetzko and  
10 coworkers [69]. Under control conditions, SP<sub>PR1</sub>-GFP is secreted to compartments with acidic pH  
11 preventing it from fluorescing and we observed only a faint signal from the perinuclear  
12 endomembrane compartments (**Figure S9b**). GFP fluorescence signal intensity and distribution was  
13 altered by treatment with the secretion pathway inhibitor brefeldin A (BFA), and resulted in the  
14 formation of GFP-positive BFA bodies (**Figure S9b**). Co-expression of SP<sub>PR1</sub>-GFP with FLAG-  
15 REX2 did not affect GFP levels, while FLAG-REX3 enhanced GFP levels in perinuclear  
16 endomembrane compartments and resulted in a strong labelling of the cortical ER (**Figure 6c**). The  
17 ability of REX3 to retain GFP in endomembrane compartments suggest that this effector may  
18 promote infection by interfering with host secretion pathways.

### 19 **The TIPTOP promoter is activated at root tip infection sites**

20 When screening our data for plant promoters responding early to *P. palmivora* attack we found  
21 Niben101Scf03747g00005, encoding a small secreted protein containing two repeats of a conserved  
22 SGPS-GxGH motif known from pathogen-associated molecular pattern (PAMP)-induced peptides



1 (PIP/PIP-like; **Figure S11**) [32] to be one of the most strongly induced plant genes. To study the  
2 spatial distribution of its promoter activity we generated transgenic *N. benthamiana* plants  
3 expressing a promoter-*GFP:uidA* reporter fusion and challenged them with *P. palmivora* LILI-td  
4 [70] expressing a red fluorescent protein. Consistent with the transcriptomics data, histochemical  
5 GUS staining revealed a localised GUS signal at the tip of infected roots (**Figure 8**) only where  
6 zoospores had accumulated but not in uninfected roots. We therefore termed the gene *TIPTOP* (*Tip*  
7 *Induced Plant Transcript switched On by P. palmivora*). *TIPTOP* promoter activation is correlated  
8 with *P. palmivora* infection (**Figure 8c**). *P. palmivora*-triggered *TIPTOP* promoter activation was  
9 strongest adjacent to invasive hyphae as revealed by GFP confocal fluorescence microscopy  
10 (**Figure 8d**). In addition, the *TIPTOP* promoter was not activated by abiotic stresses (cold, heat and  
11 1 M sodium chloride) and wounding, but weak activation was observed in root tips in response to  
12 flagellin (flg22) treatment (**Figure S14**). PlantPAN 2 [71] analysis of the *TIPTOP* promoter  
13 sequence identified various transcription factor binding motifs (**Table S5**). Taken together, these  
14 results suggest that *TIPTOP* is a root tip specific *P. palmivora*-induced promoter.

# 1 Discussion

2 We utilised a dual transcriptomics approach coupled to a semi-automatic secretome annotation  
 3 pipeline to study the interaction between *P. palmivora* and *N. benthamiana* roots. While the  
 4 pathogen transcriptome undergoes remarkable shifts in expression patterns throughout the infection  
 5 we see a steady response of the plant transcriptome with no detectable major shifts in sets of  
 6 differentially expressed genes. We used our dataset to identify *P. palmivora* and *N. benthamiana*  
 7 genes implicated in the interaction and characterised two conserved biotrophic *P. palmivora* effector  
 8 proteins which confer enhanced infection susceptibility when expressed *in planta*. We show, that  
 9 one of them, REX3, suppresses plant secretion processes. Surveying the set of early  
 10 transcriptionally activated plant genes resulted in the identification of an *N. benthamiana* gene  
 11 specifically induced at infected root tips and encoding a peptide with danger-associated molecular  
 12 features.

## 13 Dual transcriptomics and *de novo* assembly enables functional studies of unsequenced 14 genomes

15 Dual transcriptomics captures simultaneous changes in host and pathogen transcriptomes  
 16 [72,73] when physical separation of two interacting organisms is unfeasible. The diversity of plant  
 17 pathogens often results in the absence of microbial reference genomes. This is particularly relevant  
 18 for obligate biotrophic plant pathogens which cannot be cultivated separately from their host. Our  
 19 established viable alternative, a *de novo* assembly of a plant pathogen transcriptome from separated  
 20 mixed reads followed by an semi-automated annotation is thus applicable to a broader community.  
 21 Taking advantage of the availability of the host reference genome, we separated *P. palmivora* reads  
 22 from the mixed samples and combined them with reads from the *ex planta* samples to create a  
 23 single *de novo* assembly for the pathogen transcriptome.

1 Assembly completeness in terms of gene content might be assessed based on evolutionary  
2 expectations, so that recovery of conserved genes serves as a proxy measure for the overall  
3 completeness (CEGMA [74] and BUSCO [55]). Our *P. palmivora de novo* assembly had sufficient  
4 read support (on average 76% reads mapping back), so we further probed it for the presence of  
5 BUSCOs. Since there is no specific oomycete set, we checked presence of 429 eukaryotic BUSCO  
6 genes and found 326 of them (76%). Lack of some BUSCO genes in our assembly might result  
7 from the fact that originally BUSCO sets were developed to estimate completeness of genomic  
8 assemblies and did not require expression evidence [55]. To verify this, we extended the same  
9 completeness analysis to existing *Phytophthora* genomes and transcriptomes and found that  
10 transcriptomes in general indeed contained fewer BUSCOs. Moreover, we found 35 eukaryotic  
11 BUSCO genes consistently missing from *Phytophthora* genomic assemblies. Therefore, a BUSCO-  
12 based completeness test for transcriptomes should be applied with caution within the *Phytophthora*  
13 genus, considering adjustments for expression support and uneven distribution of eukaryotic single-  
14 copy orthologs. We propose that with an ever-growing body of oomycete genomic and  
15 transcriptomic data a specific set of benchmarking orthologs needs to be created to support *de novo*  
16 assemblies and facilitate studies of these economically relevant non-model plant pathogens [75].  
17 So far, dual transcriptomics has only been used with limited time resolution and sequencing depth  
18 in plant-pathogenic oomycete studies [76,77]. Our study encompasses the full range of *P. palmivora*  
19 sequential lifestyle transitions occurring in *N. benthamiana* root, allowing reconstruction of  
20 comprehensive transcriptional landscape in both interacting organisms. We found three major waves  
21 of *P. palmivora* gene expression peaks that correlate with its major lifestyle transitions: 1) early  
22 infection and biotrophic growth inside host tissues; 2) switch to necrotrophy; 3) late necrotrophy  
23 and sporulation. Similar transcription dynamics following switches of life styles were previously  
24 described for the hemibiotrophic pathogens *Colletotrichum higginsianum* [78], *Phytophthora*

1 *parasitica* [79] during *Arabidopsis* root infection and *P. sojae* upon infection of soybean leaves  
2 [80], though the exact timing of infection was different.

3 Interestingly, the *N. benthamiana* transcriptional response to infection does not mirror the observed  
4 significant shifts in infection stage specific *P. palmivora* gene expression. Instead it is characterized  
5 by steady induction and repression. High-resolution transcriptomics were applied to *A. thaliana*  
6 leaves challenged with *Botrytis cinerea* to untangle the successive steps of host response to  
7 infection [81]. However, in the absence of pathogen expression data, it is not possible to correlate  
8 these changes with changes in the pathogen transcriptome. It is likely that pathogen expression  
9 patterns are not useable to infer a link to corresponding plant responses.

10 The response of *N. benthamiana* roots to *P. palmivora* is characterised by an upregulation of genes  
11 associated with hormone physiology, notably ethylene through activation of ethylene response  
12 transcription factors (ERFs) and ACC synthase. Ethylene is involved in *N. benthamiana* resistance  
13 to *P. infestans* [82]. We also observed an induction of two PIN-like auxin efflux carriers.  
14 Suppression of the auxin response was associated with increased *A. thaliana* susceptibility to  
15 *P. cinnamomi* disease and was stimulated by phosphite-mediated resistance [83]. Interestingly,  
16 phosphite was also required for defense against *P. palmivora* [11]. We found upregulation of  
17 chitinases and endopeptidase inhibitors, such as Kunitz-type trypsin inhibitors, which are often  
18 induced by oomycete and fungal pathogens [84–86]. Induction of genes encoding O-glycosyl  
19 hydrolases is associated with cell wall remodelling while phenylalanine ammonia lyases (PAL)  
20 contribute to cell wall reinforcement by activation of lignin biosynthesis [87,88]. Upregulation of  
21 the trehalose biosynthesis pathway is associated with membrane stabilisation [89] and partially  
22 mitigates toxic effects of oxidative stress [90]. Upregulation of several enzymes of the mevalonate  
23 pathway suggest modulation of the biosynthesis of isoprenoids such as defense-associated  
24 phytoalexins as well as sterols. In particular, transcriptional repression of genes encoding sterol 4-

1 alpha-methyl-oxidase 2-1 and C5 sterol desaturases suggest an attenuation of the brassinosteroid  
2 synthesis, while repression of genes with homology to sterol methyl transferase 2 point to a  
3 repression of the beta-sitosterol/stigmasterol branch. Conversely, induction of terpenoid  
4 synthases/epi aristolochene synthases points to a selective induction of the sesquiterpenes which  
5 contain defense associated phytoalexins such as capsidiol [91,92]. Finally, the *N. benthamiana*  
6 response to *P. palmivora* also includes upregulation of genes encoding late embryogenesis abundant  
7 (LEA) proteins as well as heat shock proteins. LEA proteins have been associated with the drought  
8 response [93,94] and upregulation of genes associated with water deprivation upon *Phytophthora*  
9 infection has been previously reported [77]. Conversely, downregulated genes were mostly  
10 associated with photosynthesis, cellulose biosynthesis and cell division. These results were  
11 consistent with previous reports [95,96].

## 12 **Analysing partial transcripts improved the predicted *P. palmivora* secretome**

13 To study *P. palmivora* secreted proteins we developed a prediction and annotation pipeline tailored  
14 for signal peptide prediction based on ORFs derived from *de novo* assembled transcripts. Often a  
15 six-frame translation is utilised to identify candidate ORFs (Stothard, 2000; Lévesque et al 2010).  
16 However, we use a TransDecoder approach which enriches for the most likely translated ORF by  
17 integrating homology based matches to known Pfam domains and *Phytophthora* proteins.  
18 Compared to six-frame translation, this approach can result in partial ORFs which may lead to a  
19 mis-prediction of translation start sites and therefore signal peptides. So, we implemented a  
20 refinement step in our secretome prediction pipeline to rescue partial ORFs by finding the next  
21 likely translation start position and following the secretome prediction steps. This procedure  
22 allowed us to rescue an additional 611 ORFs including several which likely encode RXLR  
23 effectors, elicitors and cell wall degrading enzymes thus highlighting the importance of this  
24 additional step.

# 1 Effector-guided resistance breeding potential

2 We identified two RXLR effectors that show high sequence conservation among *P. palmivora*  
3 isolates worldwide, suggesting they may represent core effectors that cannot be lost or mutated  
4 without a fitness cost for the pathogen [21]. As such, these effectors constitute valuable candidates  
5 to accelerate cloning of disease resistance (*R*) genes and effector-assisted deployment of resistance.  
6 This strategy has been used against *P. infestans* [22].

7 Our approach identified a potential AVR3a homolog in *P. palmivora* (PLTG\_13552). The  
8 *P. infestans* AVR3a<sup>KI</sup> allele confers avirulence to *P. infestans* isolates on *R3a*-expressing potatoes  
9 while the AVR3a<sup>EM</sup> allele is not being recognised [63]. It will be interesting to study whether potato  
10 *R3a* or engineered *R3a* derivatives with a broader recognition spectrum [97,98] can be exploited to  
11 generate resistance towards *P. palmivora* in economically relevant transformable host plants.  
12 Additionally, *P. palmivora* proteins also harbour pep13-type MAMP motifs present in four  
13 transglutaminases and several nlp20-containing NLPs. While the pep13 plant receptor remains to be  
14 found, the receptor like kinase RLP23 has recently been identified as nlp20 receptor [99] with the  
15 potential to confer resistance even when transferred into other plant species. Introduction of RLP23  
16 into *P. palmivora* host plants may thus be another strategy to engineer resistant crops.

# 17 The *P. palmivora* effector REX3 inhibits plant secretion pathways

18 We found that REX3 interferes with host secretion, a common strategy of bacterial and oomycete  
19 pathogens [49,69]. Rerouting of the host late endocytic trafficking to the extrahaustorial membrane  
20 [41,100] and accumulation of the small GTPase RAB5 around haustoria [42] is well documented.  
21 Given that REX3 is almost invariant in *P. palmivora* it is likely that REX3 targets components of  
22 the secretory pathway which are conserved among diverse host species. Of the four functionally  
23 tested RXLR effectors the two most conserved ones (REX2, REX3) amongst *P. palmivora* isolates

both conferred increased susceptibility. REX2 and REX3 therefore represent important targets for disease resistance breeding in tropical crops. It is possible that isolate-specific variants of REX1 and REX4 may provide a colonisation benefit only in hosts other than *N. benthamiana*.

#### ***P. palmivora* triggers expression of danger-associated molecular pattern peptides**

Upon *P. palmivora* root infection 2'886 *N. benthamiana* genes were up and 3'704 genes down-regulated. Compared to previously studied root transcriptomes of responses to broad-host-range *Phytophthora* species [95,101] our data permitted the identification of early induced genes such as *TIPTOP*, a *P. palmivora*-responsive root tip promoter. An exciting future perspective is its exploitation for induced early resistance against *Phytophthora* root infections. This promoter also provides inroads to dissect early host cell responses to *P. palmivora*, when employed in combination with a cell sorting approach to generate samples enriched for infected cells.

The *TIPTOP* gene encodes a peptide with similarities to DAMP peptides [102]. The occurrence of two tandem repeats of a conserved sGPSGxGH motif in the *TIPTOP* protein is reminiscent of the SGPS/GxGH motifs of PIP and PIPLs peptides [32,103] and the closest *Arabidopsis* homologs of *TIPTOP*, PIP2 and PIP3, are implied in responses to biotic stress.

Hou and coworkers showed that the PIP1 peptide is induced by pathogen elicitors and amplifies *A. thaliana* immune response by binding to the receptor-like kinase 7 (RLK7) [32]. Analysis of *in silico* data showed that PIP2 and PIP3 were activated upon *A. thaliana* infection by *Botrytis cinerea* or *P. infestans* [103]. By contrast to PIP1 and PIP2, the *TIPTOP* promoter is inactive under control conditions, suggesting it may undergo a different transcriptional regulation than the previously characterized *Arabidopsis* peptides.

# 1 Conclusions

2 Dual transcriptomics represent a successful approach to identify transcriptionally regulated effectors  
 3 as well as plant genes implicated in the root infection process. We found conserved MAMPs and  
 4 effectors with similarity to known AVR proteins such as AVR3a which may harbour the potential  
 5 for disease resistance engineering. We characterised two conserved RXLR effectors conferring  
 6 enhanced susceptibility to root infection and confirmed interference with host secretion as a *P.*  
 7 *palmivora* pathogenicity mechanism. Furthermore, the *P. palmivora* inducible TIPTOP promoter  
 8 and the PIP2,3-like peptide are promising leads for engineering *P. palmivora* resistance. In  
 9 summary, our findings provide a rich resource for researchers studying oomycete plant interactions.

# 10 Methods

## 11 Plant material and growth conditions

12 *N. benthamiana* seeds were surface sterilized for 3 min with 70 % ethanol and 0.05 % sodium  
 13 dodecyl sulfate (SDS) and rinsed twice in sterile water. Seeds were cold-stratified for 2 days and  
 14 sown on Murashige and Skoog (MS) medium (Sigma Chemical Company) supplemented with 20  
 15 g/L sucrose and 10 g/L agar. For *in vitro* susceptibility assays, two-week-old plants were transferred  
 16 to square Petri dishes using the hydroponics system described elsewhere [104]. These dishes, each  
 17 containing five plants, were then placed slanted for 2 weeks at 25°C under a 16-h photoperiod. For  
 18 inoculations, zoospore suspension was added directly to the root compartment containing the liquid  
 19 medium.



## 1 ***P. palmivora* growth conditions and *N. benthamiana* root inoculation**

2 *P. palmivora* Butler isolate LILI (reference P16830) was initially isolated from oil palm in  
3 Colombia [70], and maintained in the *P. palmivora* collection at the Sainsbury Laboratory  
4 (Cambridge, UK). Transgenic *P. palmivora* LILI strain expressing KDEL-YFP [9] and tdTomato  
5 [70] have been previously described. *Phytophthora* growth conditions and the production of  
6 zoospores have been described elsewhere [10].

## 7 **Root inoculation and disease progression assays**

8 For the investigation of effector dynamics during infection and activation of the TIPTOP promoter,  
9 we added  $10^5$  *P. palmivora* zoospores to the liquid medium of Petri dishes containing 20-d-old  
10 plantlets grown as described already. Root infection assays were adapted from the *A. thaliana*–  
11 *P. parasitica* infection system described by Attard and coworkers [104]. One-week-old  
12 *N. benthamiana* seedlings were grown on hard (2 %) agar strips with roots immersed in 1/10th  
13 liquid MS medium for two weeks. Plates were then inoculated with 500 zoospores of *P. palmivora*  
14 LILI KDEL-YFP. Plants were scored on a daily basis using a disease index composed of five  
15 symptom extent stages (SES): healthy plants with no noticeable symptoms were given a SES value  
16 of 1. Plants with at least one wilted leaf were given a SES value of 2. Plants showing a brownish,  
17 shrunken hypocotyl were given a SES value of 3. Plants showing a brownish, shrunken hypocotyl  
18 and stem with multiple invaded or wilted leaves were given a SES value of 4. Finally, dead plants  
19 were given a SES value of 5. Statistical analyses of disease severity were based on Scheirer-Ray-  
20 Hare nonparametric two-way analysis of variance (ANOVA) for ranked data (*H*-test) [105].

## 1 **Quantitative reverse transcription-polymerase chain reaction (qRT-PCR) analyses**

2 Total RNA was extracted from frozen, axenically grown mycelium with sporangia (sample MZ) and  
 3 infected roots harvested at 3, 6, 18, 24, 30, 48 and 72 hours after inoculation (hai) using RNeasy  
 4 Plant Mini Kit (Qiagen, USA). One microgram was reverse transcribed to generate first-strand  
 5 cDNA, using the Roche Transcriptor First Strand cDNA Synthesis Kit according to the  
 6 manufacturer's instructions (Roche, Switzerland). Quality was assessed by electrophoresis on  
 7 agarose gel. qRT-PCR experiments were performed with 2.5 µl of a 1:20 dilution of first-strand  
 8 cDNA and LightCycler 480 SYBR Green I Master mix, according to the manufacturer's  
 9 instructions (Roche, Switzerland). Gene-specific oligonucleotides were designed with BatchPrimer3  
 10 software [106] (**Table S3**) and their specificity was validated by analyzing dissociation curves after  
 11 each run. Genes encoding the *P. palmivora* orthologs of *P. parasitica* elicitor OPEL and a 40S  
 12 ribosomal subunit S3A (WS21) were selected as constitutive internal controls for *P. palmivora*  
 13 genes [107]. Genes encoding L23 (Niben101Scf01444g02009) and FBOX  
 14 (Niben101Scf04495g02005) were selected as constitutive internal controls for *N. benthamiana*  
 15 genes [108]. Three biological replicates of the entire experiment were performed. Gene expression  
 16 was normalized with respect to constitutively expressed internal controls, quantified and plotted  
 17 using R software.

## 18 **Plasmid construction**

19 The vector pTrafficLights was derived from pK7WGF2 (Plant System Biology, Gent University,  
 20 Belgium). A cassette containing the signal peptide sequence of *Nicotiana tabacum* pathogenesis-  
 21 related protein 1 (PR-1; GenBank accession X06930.1) fused in frame with the green fluorescent  
 22 protein (GFP) was obtained by PCR using primers SP-F/SP-R (**Table S3**) and ligated into  
 23 pK7WGF2 using SpeI and EcoRI restriction enzymes. The AtUBQ10*pro*::DsRed cassette was  
 24 amplified from pK7WGIGW2(II)-RedRoot (Wageningen University, Netherlands) using primers

1 RedRoot-F/RedRoot-R (**Table S3**) and ligated into pK7WGF2 using XbaI and BamHI restriction  
2 enzymes.  
3 The TIPTOP promoter (1230 bp, ending 46 bp before start codon) was PCR-amplified from  
4 *N. benthamiana* genomic DNA using primers TIPTOP-F2/TIPTOP-R2 (**Table S3**) and cloned into  
5 pENTR/D-Topo vector (Life Technologies Inc., Gaithersburg, Maryland, USA). The entry vector  
6 was then used for LR recombination (Life Technologies Inc., Gaithersburg, Maryland, USA) into  
7 expression vector pBGWFS7 (Plant System Biology, Gent University, Belgium).

## 8 **Transient *Agrobacterium tumefaciens* mediated expression**

9 For transient expression of effectors in *N. benthamiana* leaves, *A. tumefaciens* cells (strain GV3101-  
10 pMP90) were grown overnight with appropriate antibiotics. The overnight culture was then  
11 resuspended in agroinfiltration medium composed of 10 mM MgCl<sub>2</sub>, 10 mM 2-(N-morpholino)  
12 ethanesulfonic acid (MES) pH 5.7 and 200 μM acetosyringone. Optical density at 600 nm (OD<sub>600</sub>)  
13 was then adjusted to 0.4 for transient expression of effectors. For secretion inhibition assays,  
14 effectors and pTrafficLights construct were mixed together in a 1:1 ratio to a final OD<sub>600</sub> of 0.8.  
15 Agroinfiltrations were performed after 3-h-long incubation at 28°C using a syringe without a needle  
16 on the abaxial side of 5-week-old *N. benthamiana* leaves.

## 17 **Generation of transgenic *Nicotiana benthamiana***

18 *N. benthamiana* stable transformation was performed according to [109] with the following  
19 modifications: leaf discs were incubated in shoot-inducing medium (SIM) composed of 1X  
20 Murashige and Skoog (MS) medium supplemented with 2 % sucrose, 0.7 % agar, 50 mg/L  
21 kanamycin, 50 mg/L carbenicillin, 500 mg/L timentin and a 40:1 ratio of 6-benzylaminopurine  
22 (BAP) and 1-naphthaleneacetic acid (NAA). Emerging shoots were cut and transferred to root-

1 inducing medium (RIM), which has same composition as SIM without BAP. After the first roots  
2 emerged, plantlets were transferred to soil and grown at 25°C under 16-h photoperiod.

### 3 **Histochemical staining for GUS activity**

4 Transgenic *N. benthamiana* plantlets carrying pTIPTOP*pro::GFP::GUS* sequence were harvested 14  
5 hours after inoculation and incubated in a staining solution containing 100 mM sodium phosphate  
6 pH 7.0, 0.1% (v/v) Triton X-100, 5 mM K<sub>3</sub>Fe(CN)<sub>6</sub>, 5 mM K<sub>4</sub>Fe(CN)<sub>6</sub> and 2 mM 5-bromo-4-  
7 chloro-3-indoxyl-β-D-glucuronid acid (X-gluc). Staining was carried out for 3 hours at 37°C. The  
8 plantlets were then washed with distilled water and observed with an AxioImager M1  
9 epifluorescence microscope (Zeiss, Germany) equipped for Nomarski differential interference  
10 contrast (DIC).

### 11 **Confocal microscopy**

12 Confocal laser scanning microscopy images were obtained with a Leica SP8 laser-scanning  
13 confocal microscope equipped with a 63x 1.2 numerical aperture (NA) objective (Leica, Germany).  
14 A white-light laser was used for excitation at 488 nm for GFP visualization, at 514 nm for YFP  
15 visualization and at 543 nm for the visualization of tdTomato. Pictures were analysed with ImageJ  
16 software (<http://imagej.nih.gov/ij/>) and plugin BioFormats.

### 17 **Library preparation and sequencing**

18 *N. benthamiana* and *P. palmivora* mRNAs were purified using Poly(A) selection from total RNA  
19 sample, and then fragmented. cDNA library preparation was performed with the TruSeq® RNA  
20 Sample Preparation Kit (Illumina, US) according to the manufacturer's protocol. cDNA sequencing

1 of the 13 samples (MZ, infected *N. benthamiana* root samples and uninfected *N. benthamiana*  
2 plants) was performed in 4 lanes of Illumina NextSeq 2500 a in 100 paired end mode. Samples were  
3 de-multiplexed and analyzed further.  
4 mRNAs from additional samples of a short leaf time course (*P. palmivora* mycelium,  
5 *N. benthamiana* leaves 2 dai and *N. benthamiana* leaves 3 dai) were purified using Poly(A)  
6 selection from total RNA sample. cDNA libraries were prepared using NEBNext® RNA library  
7 preparation kit (New England Biolabs, UK) according to the manufacturer's protocol and  
8 sequenced on Illumina GAII Genome Analyzer in a 76 paired end mode in 3 separate lanes. Reads  
9 obtained from these three samples were used for *P. palmivora de novo* transcriptome assembly only.  
10 The raw fastq data are accessible at <http://www.ncbi.nlm.nih.gov/sra/> with accession number  
11 SRP096022.

## 12 ***De novo* transcriptome assembly**

13 In order to capture the full complexity of the *P. palmivora* transcriptome we pooled all the samples  
14 potentially containing reads from *P. palmivora* (**Figure 2**): eight mixed (plant-pathogen, combining  
15 leaf and root infections), one exclusively mycelium and one mixed mycelium-zoospores sample.  
16 Initial read quality assessment was done with FastQC (Babraham Bioinformatics, Cambridge, UK).  
17 Adaptors were removed using CutAdapt [110]. To exclude plant reads from the library, raw paired-  
18 reads were first aligned to *N. benthamiana* reference genome (v1.01) using Tophat2 [111].  
19 Unmapped reads (with both mates unmapped) were collected with samtools (samtools view -b -f 12  
20 -F 256), converted to fastq with bedtools and processed further. To estimate the level of residual  
21 contamination by plant and potentially bacterial reads, the resulting set of reads was subjected to  
22 FastQ Screen against the UniVec database, all bacterial and archaeal sequences obtained from  
23 RefSeq database, all viral sequences obtained from RefSeq database, *N. benthamiana* genome  
24 (v1.01), and subset 16 oomycete species (mostly *Phytophthora* species). Since the above test

revealed substantial residual contamination by *N. benthamiana* reads, an additional round of bowtie2 alignment directly to *N. benthamiana* transcriptome [53] was performed followed by FastQ Screen. Reads, not aligned to *N. benthamiana* genome and transcriptome were further subjected to quality control using Trimmomatic (minimum read length = 60). The quality parameters for the library were assessed using FastQC. The total of ~190 M filtered reads were subjected to *de novo* assembly with Trinity (trinity v2.1.1) on a high-RAM server with minimal k-mer coverage = 2 and k-mer length = 25. *In silico* read normalization was used due to the large number of input reads, in order to improve assembly efficiency and to reduce run times [57]. The resulting assembly was additionally checked for plant contamination using blastn search against plant division of NCBI RefSeq genomic database. Trinity genes having significant sequence similarity (e-value threshold  $\leq 10^{-5}$ ) to plant sequences were removed from the resulting transcriptome. The final version of assembly included trinity genes with sufficient read support.

### ***De novo* assembly statistics and integrity assessment**

General statistics of the assembly were determined using the ‘TrinityStats.pl’ script provided with Trinity release and independently using Transrate (<http://hibberdlab.com/transrate/>) and Detonate (<http://deweylab.biostat.wisc.edu/detonate/>) tools. Assembly completeness was estimated using the eukaryotic set of BUSCO profiles (v1) [55]. BUSCO analysis was performed for the full transcriptome assembly and for the reduced assembly, obtained after retaining only the longest isoform per trinity gene. BUSCO genes missing from the assembly were annotated with InterProScan based on the amino acid sequences emitted from the corresponding hmm profile (‘hmmemit’ function from hmmer package, <http://hmmer.org/>). Overall expression support per assembled transcript was performed after transcript abundance estimation. Trinity genes with TPM  $\geq 1$  in at least 3 samples were considered further.

## 1 Protein prediction and annotation

2 ORFs were predicted using TransDecoder software [57]. At the first step ORFs longer than 100 aa  
3 were extracted. The top 500 longest ORFs were used for training a Markov model for coding  
4 sequences, candidate coding regions were identified based on log-likelihood score. Additionally all  
5 the ORFs having homology to protein domains from the Pfam database and/or *P. sojae*,  
6 *P. parasitica*, *P. infestans* and *P. ramorum* protein sequences downloaded from Uniprot database  
7 (accession numbers: UP000005238, UP000006643, UP000002640, UP000018817) were also  
8 retained (blastp parameters: max\_target\_seqs 1 -evalue 1e-5).

## 9 Secretome prediction

10 For the automatic secretome prediction a custom script was written, employing steps taken for  
11 *P. infestans* secretome identification [16]. Predicted proteins were subsequently submitted to  
12 SignalP 2.0 (Prediction = 'Signal peptide'), SignalP 3.0 (Prediction = 'Signal peptide', Y max score  
13  $\geq 0.5$ , D score  $\geq 0.5$ , S probability  $\geq 0.9$ ), TargetP (Location = 'Secreted') [112] and TMHMM  
14 (ORFs with transmembrane domains after predicted signal peptide cleavage site were removed)  
15 [113]. Finally, all proteins with terminal 'KDEL' or 'HDEL' motifs were also removed, as these  
16 motifs are known to be ER-retention signals [114]. Exact duplicated sequences and substrings of  
17 longer ORFs were removed to construct non-redundant set of putative secreted proteins. Taking into  
18 account possible fragmentation of *de novo* assembled transcripts a custom python script (M-slicer)  
19 was developed to rescue partial proteins with mis-predicted CDS coordinates. It takes as an input all  
20 the partial translated ORFs, which were not predicted to be secreted initially and creates a sliced  
21 sequence by finding the position of the next methionine. The M-sliced proteins were subjected to  
22 the same filtering step as was done with the initial secretome. The same script, omitting the M-slicer

1 refinement, was used to systematically predict *N. benthamiana* genes encoding putative secreted  
2 proteins.

### 3 **Secretome annotation**

4 To annotate putative secreted proteins a complex approach was used, combining several lines of  
5 evidence: 1) blastp search against GenBank NR database with e-value  $\leq 10^{-6}$ ; 2) InterProScan  
6 (version 5.16) search against databases of functional domains (PANTHER, Pfam, Coils, Gene3D,  
7 SUPERFAMILY, SMART, PIRSF, PRINTS) with default parameters [115]; 3) RXLR and EER  
8 motif prediction using regular expressions; 4) WY motif prediction based on WY-fold HMM by  
9 hmmsearch function from HMM3 package (<http://hmmer.org/>); 5) LxLFLAK and HVLVVVP motif  
10 predictions based on HMM model build on sequences of known CRN effectors; 6) NLS motif  
11 prediction by NLStradamus [116] (version 1.8, posterior threshold = 0.6) and PredictNLS  
12 [117] with default parameters. The TribeMCL algorithm was used to cluster predicted putative  
13 secreted proteins with signal peptide and after signal peptide cleavage (mature proteins). The tribing  
14 results were used as a soft guidance for functional annotation (proteins belonging to the same tribe  
15 are likely to have the same function). All obtained data were aggregated in the **Supplementary**  
16 **Dataset: Annotated *P. palmivora* secretome**. Functional categories were assigned based on manual  
17 curation of the resulting table. 'Hypothetical' category was assigned to proteins either having  
18 similarity to only hypothetical proteins or when the top 20 hits of blastp output did not show  
19 consistency in terms of distinct functional categories. Proteins having significant sequence  
20 similarity to ribosomal, transmembrane proteins or proteins with known intracellular localization  
21 (e.g. heat shock proteins) and/or having respective domains identified by InterProScan were marked  
22 as false predictions. A contamination category was assigned for proteins with significant sequence  
23 similarity (revealed by blastp) to amino acid sequences from phylogenetically distant taxa (e.g.



1 plants or bacteria). Entries marked as both 'false prediction' or 'contamination' were excluded from  
2 the final secretome.

### 3 **Transcriptome annotation**

4 All the remaining predicted proteins were annotated by scanning against InterProScan databases of  
5 functional domains (version 5.16-55) and by performing blastp search against GenBank NR  
6 database (download date: 06.01.2016) and published reference *Phytophthora* genomes. For  
7 transcripts without predicted ORFs blastn search against the GenBank NR database was performed,  
8 and the top hit with  $e\text{-value} \leq 10^{-5}$  was reported (**Supplementary Dataset:**  
9 **Whole\_transcriptome\_expression\_TMM\_TPM\_normalised\_filtered\_PLTG**).

### 10 **Expression analysis**

11 Initial reads after quality control were separately aligned aligned back to the *P. palmivora de novo*  
12 transcriptome assembly and *N. benthamiana* reference transcriptome. Alignment-based transcript  
13 quantification was done using RSEM (version: RSEM-1.2.25, (<http://deweylab.github.io/RSEM/>)  
14 [118]). For *P. palmivora* quantification was performed on 'trinity gene' level. For within-sample  
15 normalisation TPMs were calculated. Between-sample normalisation was done using trimmed  
16 means approach (TMM) [119]. TMM-normalised TPMs were reported for both *P. palmivora* and *N.*  
17 *benthamiana*. PCA-analysis was performed on the log-transformed TPM values and visualized in R  
18 with the help of "ggplot2" [120] and "pheatmap" [121] packages. Overlap between groups of genes  
19 identified in the PCA analysis was visualised with "Vennable" package [122]. Differentially  
20 expressed genes were identified with edgeR Bioconductor package [119] following pair-wise  
21 comparisons between all the samples. The dispersion parameter was estimated from the data with  
22 the estimateDisp function on reduced datasets: for *P. palmivora* we combined close time points

1 (based on PCA analysis) and treated them as pseudo-replicates; for *N benthamiana* common  
2 dispersion was estimated based on 6 uninfected plant samples, treating them as replicates. The  
3 resulting common dispersion values of 0.15 and 0.1 were used for *P. palmivora* and *N. benthamiana*  
4 analysis, respectively. Most differentially expressed genes ( $\log_2(\text{fold change}) \geq 2$  and  $p\text{-value} \leq 10^{-3}$   
5 were used to perform hierarchical clustering of samples. Heatmaps for the most differentially  
6 expressed genes were generated using R “cluster” [123], “Biobase” [124] and “qvalue” packages.  
7 For the final heatmaps TPMs were  $\log_2$ -transformed and then median-centered by transcript. Plant  
8 samples were centered according to the full set of mock and infected sample. Temporal clustering of  
9 expression profiles was done with fuzzy clustering (Mfuzz Bioconductor package) [68] to adopt  
10 gradual temporal changes of gene expression in the course of infection. GO-enrichment analysis  
11 was done with the help of “topGO” Bioconductor package [125]. Gene universe was defined based  
12 on *N. benthamiana* genes having expression evidence in our dataset (having  $\text{TPM} \geq 1$  in at least 3  
13 samples). For the enrichment analysis exact Fisher test was used and GO-terms with  $p\text{-values} \leq$   
14 0.05 were reported. ReviGO [126] was used to summarize the resulting significant GO-terms and  
15 reduce redundancy.

## 16 Abbreviations

|    |            |                                |
|----|------------|--------------------------------|
| 17 | <b>DEG</b> | differentially expressed genes |
| 18 | <b>CRN</b> | crinkler effector              |
| 19 | <b>LFC</b> | log fold change                |
| 20 | <b>FDR</b> | false discovery rate           |
| 21 | <b>ORF</b> | open reading frame             |

|    |              |                                                |
|----|--------------|------------------------------------------------|
| 1  | <b>TPM</b>   | transcripts per million                        |
| 2  | <b>TMM</b>   | trimmed mean of m-values                       |
| 3  | <b>PCA</b>   | principal component analysis                   |
| 4  | <b>BUSCO</b> | benchmarking universal single-copy orthologs   |
| 5  | <b>REX</b>   | putative RXLR-effector expressed               |
| 6  | <b>NPP</b>   | necrosis-inducing <i>Phytophthora</i> protein  |
| 7  | <b>SCR</b>   | small cysteine-rich peptides                   |
| 8  | <b>PLTG</b>  | <i>Phytophthora palmivora</i> transcribed gene |
| 9  | <b>PI</b>    | protease inhibitor                             |
| 10 | <b>TM</b>    | transmembrane domain                           |
| 11 | <b>SP</b>    | signal peptide                                 |
| 12 | <b>SES</b>   | symptoms extend stage                          |
| 13 | <b>aa</b>    | amino acid                                     |
| 14 | <b>hai</b>   | hours after inoculation                        |
| 15 | <b>dai</b>   | days after inoculation                         |

## 16 **Declarations**

### 17 **Ethics approval and consent to participate**

18 Not applicable

# 1 **Consent for publication**

2 Not applicable

# 3 **Availability of data and materials**

4 The raw fastq files are available in the SRA archive under SRP096022 accession number.

# 5 **Competing interests**

6 The authors declare that they have no competing interests

# 7 **Funding**

8 This work was supported by the Gatsby Charitable Foundation (RG62472), by the Royal Society  
9 (RG69135), and by the European Research Council (ERC-2014-STG, H2020, 637537).

# 10 **Authors' contributions**

11 KF, CQ and MD generated constructs. TY and EE generated *N. benthamiana* transgenics. FT and  
12 EE characterized transgenics. MD, EE and TH obtained microscopic data. AG performed  
13 bioinformatics analysis. EE, AG and SS analyzed the data and wrote the manuscript.

# 14 **Acknowledgements**

15 We acknowledge the experimental and annotation help by Abhishek Chatterjee and Schornack lab.  
16 We would like to thank Mike Coffey and Joe Win for provision of pathogen isolates and list of  
17 oomycete RXLRs. We are indebted to Diane Saunders, Liliana Cano, Jodie Pike and Sophien  
18 Kamoun for generating leaf transcriptome sequences. We would like to thank Ruth Le Fevre and  
19 Stuart Fawke for proof-reading the manuscript.

# 1 References

- 2 1. Erwin DD, Ribeiro OK. *Phytophthora* diseases worldwide. American Phytopathological Society  
3 (APS Press); 1996.
- 4 2. Yoshida K, Schuenemann VJ, Cano LM, Pais M, Mishra B, Sharma R, et al. The rise and fall of  
5 the *Phytophthora infestans* lineage that triggered the Irish potato famine. *Elife*. 2013;2013:1–25.
- 6 3. McHau GRA, Coffey MD. Isozyme diversity in *Phytophthora palmivora*: evidence for a  
7 southeast Asian centre of origin. *Mycol. Res.* 1994;98:1035–43.
- 8 4. Scott P, Burgess T, Hardy G. Globalization and *Phytophthora*. *Phytophthora A Glob. Perspect.*  
9 2013;226–32.
- 10 5. Drenth A, Sendall B. Economic Impact of *Phytophthora* Diseases in Southeast Asia. *Divers.*  
11 *Manag. Phytophthora Southeast Asia*. Australian Centre for International Agricultural Research  
12 (ACIAR); 2004.
- 13 6. Sankar MS, Nath VS, Misra RS, Lajapathy Jeeva M. Incidence and identification of Cassava  
14 tuber rot caused by *Phytophthora palmivora*. *Arch. Phytopathol. Plant Prot.* Taylor & Francis;  
15 2013;46:741–6.
- 16 7. Brooks F. *Phytophthora palmivora*. *Most*. 2005;4:2.
- 17 8. Torres GA, Sarria GA, Martinez G, Varon F, Drenth A, Guest DI. Bud Rot Caused by  
18 *Phytophthora palmivora* : A Destructive Emerging Disease of Oil Palm. *Phytopathology*. Am  
19 Phytopath Society; 2016;PHYTO-09-15-024.
- 20 9. Rey T, Chatterjee A, Buttay M, Toulotte J, Schornack S. *Medicago truncatula* symbiosis mutants  
21 affected in the interaction with a biotrophic root pathogen. *New Phytol.* Wiley Online Library;  
22 2015;206:497–500.
- 23 10. Le Fevre R, O’Boyle B, Moscou MJ, Schornack S. Colonization of barley by the broad-host  
24 hemibiotrophic pathogen *Phytophthora palmivora* uncovers a leaf development dependent  
25 involvement of MLO. *Mol. Plant-Microbe Interact.* Am Phytopath Society; 2016;29:385–95.
- 26 11. Daniel R, Guest D. Defence responses induced by potassium phosphonate in *Phytophthora*  
27 *palmivora*-challenged *Arabidopsis thaliana*. *Physiol. Mol. Plant Pathol.* Elsevier; 2006;67:194–201.
- 28 12. Judelson HS, Blanco FA. The spores of *Phytophthora*: weapons of the plant destroyer. *Nat. Rev.*  
29 *Microbiol.* 2005;3:47–58.
- 30 13. Petre B, Kamoun S. How Do Filamentous Pathogens Deliver Effector Proteins into Plant Cells?  
31 *PLoS Biol.* 2014;12.
- 32 14. Hardham AR. Cell biology of plant-oomycete interactions. *Cell. Microbiol.* 2007;9:31–9.

- 1 15. Randall TA, Dwyer RA, Huitema E, Beyer K, Cvitanich C, Kelkar H, et al. Large-scale gene  
2 discovery in the oomycete *Phytophthora infestans* reveals likely components of phytopathogenicity  
3 shared with true fungi. *Mol. Plant-Microbe Interact.* 2005;18:229–43.
- 4 16. Raffaele S, Farrer RA, Cano LM, Studholme DJ, MacLean D, Thines M, et al. Genome  
5 evolution following host jumps in the Irish potato famine pathogen lineage. *Science. American*  
6 *Association for the Advancement of Science*; 2010;330:1540–3.
- 7 17. Whisson SC, Boevink PC, Moleleki L, Avrova AO, Morales JG, Gilroy EM, et al. A  
8 translocation signal for delivery of oomycete effector proteins into host plant cells. *Nature. Nature*  
9 *Publishing Group*; 2007;450:115–8.
- 10 18. Schornack S, van Damme M, Bozkurt TO, Cano LM, Smoker M, Thines M, et al. Ancient class  
11 of translocated oomycete effectors targets the host nucleus. *Proc. Natl. Acad. Sci. U. S. A.*  
12 2010;107:17421–6.
- 13 19. Torto TA, Li S, Styer A, Huitema E, Testa A, Gow N a R, et al. EST Mining and Functional  
14 Expression Assays Identify Extracellular Effector Proteins From the Plant Pathogen *Phytophthora*.  
15 *Cold Spring Harb. Lab. Press.* 2003;1675–85.
- 16 20. Anderson RG, Deb D, Fedkenheuer K, McDowell JM. Recent Progress in RXLR Effector  
17 Research. *Mol. Plant-Microbe Interact.* 2015;28:1063–72.
- 18 21. Dangl JL, Horvath DM, Staskawicz BJ. Pivoting the plant immune system from dissection to  
19 deployment. *Science. American Association for the Advancement of Science*; 2013;341:746–51.
- 20 22. Vleeshouwers VG a a, Raffaele S, Vossen JH, Champouret N, Oliva R, Segretin ME, et al.  
21 Understanding and exploiting late blight resistance in the age of effectors. *Annu. Rev. Phytopathol.*  
22 2011;49:507–31.
- 23 23. Yang H, Tao Y, Zheng Z, Li C, Sweetingham MW, Howieson JG. Application of next-generation  
24 sequencing for rapid marker development in molecular plant breeding: a case study on anthracnose  
25 disease resistance in *Lupinus angustifolius* L. *BMC Genomics.* 2012;13:318.
- 26 24. Anderson RG, Casady MS, Fee R a, Vaughan MM, Deb D, Fedkenheuer K, et al. Homologous  
27 RXLR effectors from *Hyaloperonospora arabidopsidis* and *Phytophthora sojae* suppress immunity  
28 in distantly related plants. *Plant J. Wiley Online Library*; 2012;72:1–12.
- 29 25. Cooke DEL, Cano LM, Raffaele S, Bain RA, Cooke LR, Etherington GJ, et al. Genome  
30 Analyses of an Aggressive and Invasive Lineage of the Irish Potato Famine Pathogen. *PLoS Pathog.*  
31 *Public Library of Science*; 2012;8:e1002940.
- 32 26. Jones JDG, Dangl JL. The plant immune system. *Nature. Nature Publishing Group*;  
33 2006;444:323–9.
- 34 27. Nurnberger T, Nennstiel D, T; J, Sacks W., Hahlbrock K., Scheel D. High affinity binding of a  
35 fungal oligopeptide elicitor to parsley plasma membranes triggers multiple defense responses. *Cell.*  
36 1994;V78:p.449-60.

- 1 28. Brunner F, Rosahl S, Lee J, Rudd JJ, Geiler C, Kauppinen S, et al. Pep-13, a plant defense-  
2 inducing pathogen-associated pattern from *Phytophthora* transglutaminases. EMBO J.  
3 2002;21:6681–8.
- 4 29. Ryan C a, Pearce G. Systemins: a functionally defined family of peptide signals that regulate  
5 defensive genes in Solanaceae species. Proc. Natl. Acad. Sci. U. S. A. 2003;100 Suppl:14577–80.
- 6 30. Matsubayashi Y. Post-translational modifications in secreted peptide hormones in plants. Plant  
7 Cell Physiol. 2011;52:5–13.
- 8 31. Boller T, Flury P. Peptides as Danger Signals : MAMPs and DAMPs. Plant Signal. Pept.  
9 Springer; 2012. p. 163–81.
- 10 32. Hou S, Wang X, Chen D, Yang X, Wang M, Turrà D, et al. The Secreted Peptide PIP1 Amplifies  
11 Immunity through Receptor-Like Kinase 7. PLoS Pathog. 2014;10.
- 12 33. Tai TH, Dahlbeck D, Clark ET, Gajiwala P, Pasion R, Whalen MC, et al. Expression of the Bs2  
13 pepper gene confers resistance to bacterial spot disease in tomato. Proc. Natl. Acad. Sci.  
14 1999;96:14153–8.
- 15 34. Zipfel C, Kunze G, Chinchilla D, Caniard A, Jones JDG, Boller T, et al. Perception of the  
16 Bacterial PAMP EF-Tu by the Receptor EFR Restricts Agrobacterium-Mediated Transformation.  
17 Cell. 2006;125:749–60.
- 18 35. Takemoto D, Jones DA, Hardham AR. GFP-tagging of cell components reveals the dynamics of  
19 subcellular re-organization in response to infection of Arabidopsis by oomycete pathogens. Plant J.  
20 2003;33:775–92.
- 21 36. Takemoto D. The cytoskeleton as a regulator and target of biotic interactions in plants. Plant  
22 Physiol. 2004;136:3864–76.
- 23 37. Lipka V, Dittgen J, Bednarek P, Bhat R, Wiermer M, Stein M, et al. Pre- and postinvasion  
24 defenses both contribute to nonhost resistance in *Arabidopsis*. Science. 2005;310:1180–3.
- 25 38. Kwon C, Bednarek P, Schulze-Lefert P. Secretory pathways in plant immune response. Plant  
26 Physiol. 2008;147:1575–83.
- 27 39. An Q, Hükelhoven R, Kogel KH, van Bel AJE. Multivesicular bodies participate in a cell wall-  
28 associated defence response in barley leaves attacked by the pathogenic powdery mildew fungus.  
29 Cell. Microbiol. 2006;8:1009–19.
- 30 40. An Q, Ehlers K, Kogel KH, Van Bel AJE, Hükelhoven R. Multivesicular compartments  
31 proliferate in susceptible and resistant MLA12-barley leaves in response to infection by the  
32 biotrophic powdery mildew fungus. New Phytol. 2006;172:563–76.
- 33 41. Lu YJ, Schornack S, Spallek T, Geldner N, Chory J, Schellmann S, et al. Patterns of plant  
34 subcellular responses to successful oomycete infections reveal differences in host cell  
35 reprogramming and endocytic trafficking. Cell. Microbiol. 2012;14:682–97.

- 1 42. Inada N, Betsuyaku S, Shimada TL, Ebine K, Ito E, Kutsuna N, et al. Modulation of plant RAB  
2 GTPase-mediated membrane trafficking pathway at the interface between plants and obligate  
3 biotrophic pathogens. *Plant Cell Physiol.* 2016;57:1854–64.
- 4 43. Rose JK, Ham KS, Darvill AG, Albersheim P. Molecular cloning and characterization of  
5 glucanase inhibitor proteins: coevolution of a counterdefense mechanism by plant pathogens. *Plant*  
6 *Cell.* 2002;14:1329–45.
- 7 44. Tian M, Huitema E, Da Cunha L, Torto-Alalibo T, Kamoun S. A Kazal-like extracellular serine  
8 protease inhibitor from *Phytophthora infestans* targets the tomato pathogenesis-related protease  
9 P69B. *J. Biol. Chem.* 2004;279:26370–7.
- 10 45. Tian M, Benedetti B, Kamoun S. A Second Kazal-like protease inhibitor from *Phytophthora*  
11 *infestans* inhibits and interacts with the apoplastic pathogenesis-related protease P69B of tomato.  
12 *Plant Physiol.* 2005;138:1785–93.
- 13 46. Tian M, Win J, Song J, van der Hoorn R, van der Knaap E, Kamoun S. A *Phytophthora*  
14 *infestans* cystatin-like protein targets a novel tomato papain-like apoplastic protease. *Plant Physiol.*  
15 2007;143:364–77.
- 16 47. Song J, Win J, Tian M, Schornack S, Kaschani F, Ilyas M, et al. Apoplastic effectors secreted by  
17 two unrelated eukaryotic plant pathogens target the tomato defense protease Rcr3. *Proc. Natl. Acad.*  
18 *Sci. U. S. A.* 2009;106:1654–9.
- 19 48. Kaschani F, Shabab M, Bozkurt TO, Shindo T, Schornack S, Gu C, et al. An effector-targeted  
20 protease contributes to defense against *Phytophthora infestans* and is under diversifying selection in  
21 natural hosts. *Plant Physiol. Am Soc Plant Biol.* 2010;154:1794–804.
- 22 49. Bozkurt TO, Schornack S, Win J, Shindo T, Ilyas M, Oliva R, et al. *Phytophthora infestans*  
23 effector AVRblb2 prevents secretion of a plant immune protease at the haustorial interface. *Proc.*  
24 *Natl. Acad. Sci.* 2011;108:20832–7.
- 25 50. Goodin MM, Zaitlin D, Naidu R a, Lommel S a. *Nicotiana benthamiana*: its history and future  
26 as a model for plant-pathogen interactions. *Mol. Plant. Microbe. Interact. Am Phytopath Society;*  
27 2008;21:1015–26.
- 28 51. Avrova AO, Boevink PC, Young V, Grenville-Briggs LJ, Van West P, Birch PRJ, et al. A novel  
29 *Phytophthora infestans* haustorium-specific membrane protein is required for infection of potato.  
30 *Cell. Microbiol.* 2008;10:2271–84.
- 31 52. Ah Fong AM V, Judelson HS. Cell cycle regulator Cdc14 is expressed during sporulation but not  
32 hyphal growth in the fungus-like oomycete *Phytophthora infestans*. *Mol. Microbiol.* 2003;50:487–  
33 94.
- 34 53. Nakasugi K, Crowhurst RN, Bally J, Wood CC, Hellens RP, Waterhouse PM. *De Novo*  
35 *Transcriptome Sequence Assembly and Analysis of RNA Silencing Genes of Nicotiana*  
36 *benthamiana*. *PLoS One.* 2013;8.



- 1 54. Haas BJ. Assessing the Read Content of the Transcriptome Assembly [Internet]. 2016. Available  
2 from: [https://github.com/trinityrnaseq/trinityrnaseq/wiki/RNA-Seq-Read-Representation-by-](https://github.com/trinityrnaseq/trinityrnaseq/wiki/RNA-Seq-Read-Representation-by-Trinity-Assembly)  
3 Trinity-Assembly
- 4 55. Simão FA, Waterhouse RM, Ioannidis P, Kriventseva E V, Zdobnov EM. BUSCO: Assessing  
5 genome assembly and annotation completeness with single-copy orthologs. *Bioinformatics*.  
6 2015;31:3210–2.
- 7 56. Meijer HJG, Mancuso FM, Espadas G, Seidl MF, Chiva C, Govers F, et al. Profiling the  
8 secretome and extracellular proteome of the potato late blight pathogen *Phytophthora infestans*.  
9 *Mol. Cell. Proteomics*. 2014;M113.035873-.
- 10 57. Haas BJ, Papanicolaou A, Yassour M, Grabherr M, Blood PD, Bowden J, et al. *De novo*  
11 transcript sequence reconstruction from RNA-seq using the Trinity platform for reference  
12 generation and analysis. *Nat. Protoc*. 2013;8:1494–512.
- 13 58. Nielsen H, Krogh A. Prediction of signal peptides and signal anchors by a hidden Markov  
14 model. *Intell. Syst. Mol. Biol*. 1998;6:122–30.
- 15 59. Bendtsen JD, Nielsen H, Von Heijne G, Brunak S. Improved prediction of signal peptides:  
16 SignalP 3.0. *J. Mol. Biol*. 2004;340:783–95.
- 17 60. Emanuelsson O, Brunak S, von Heijne G, Nielsen H. Locating proteins in the cell using TargetP,  
18 SignalP and related tools. *Nat. Protoc*. 2007;2:953–71.
- 19 61. Raffaele S, Win J, Cano LM, Kamoun S. Analyses of genome architecture and gene expression  
20 reveal novel candidate virulence factors in the secretome of *Phytophthora infestans*. *BMC*  
21 *Genomics*. 2010;11:637.
- 22 62. Sperschneider J, Williams AH, Hane JK, Singh KB, Taylor JM. Evaluation of Secretion  
23 Prediction Highlights Differing Approaches Needed for Oomycete and Fungal Effectors. *Front.*  
24 *Plant Sci*. 2015;6:1–14.
- 25 63. Bos JIB, Chaparro-Garcia A, Quesada-Ocampo LM, McSpadden Gardener BB, Kamoun S.  
26 Distinct amino acids of the *Phytophthora infestans* effector AVR3a condition activation of R3a  
27 hypersensitivity and suppression of cell death. *Mol. Plant-Microbe Interact*. 2009;22:269–81.
- 28 64. Zhang D, Burroughs AM, Vidal ND, Iyer LM, Aravind L. Transposons to toxins: The  
29 provenance, architecture and diversification of a widespread class of eukaryotic effectors. *Nucleic*  
30 *Acids Res*. 2016;44:3513–33.
- 31 65. van Damme M, Bozkurt TO, Cakir C, Schornack S, Sklenar J, Jones AME, et al. The Irish  
32 Potato Famine Pathogen *Phytophthora infestans* Translocates the CRN8 Kinase into Host Plant  
33 Cells. *PLoS Pathog*. 2012;8.
- 34 66. Larroque M, Barriot R, Bottin A, Barre A, Rougé P, Dumas B, et al. The unique architecture and  
35 function of cellulose-interacting proteins in oomycetes revealed by genomic and structural analyses.  
36 *BMC Genomics*. 2012;13:605.

- 1 67. Böhm H, Albert I, Oome S, Raaymakers TM, Van den Ackerveken G, Nürnberger T. A  
2 Conserved Peptide Pattern from a Widespread Microbial Virulence Factor Triggers Pattern-Induced  
3 Immunity in *Arabidopsis*. PLoS Pathog. 2014;10.
- 4 68. Kumar L, E Futschik M. Mfuzz: a software package for soft clustering of microarray data.  
5 Bioinformatics. 2007;2:5–7.
- 6 69. Bartetzko V, Sonnewald S, Vogel F, Hartner K, Stadler R, Hammes UZ, et al. The *Xanthomonas*  
7 *campestris* pv. *vesicatoria* type III effector protein XopJ inhibits protein secretion: evidence for  
8 interference with cell wall-associated defense responses. Mol. Plant. Microbe. Interact.  
9 2009;22:655–64.
- 10 70. Chaparro-Garcia A, Wilkinson RC, Gimenez-Ibanez S, Findlay K, Coffey MD, Zipfel C, et al.  
11 The receptor-like kinase SERK3/BAK1 is required for basal resistance against the late blight  
12 pathogen *Phytophthora infestans* in *Nicotiana benthamiana*. PLoS One. Public Library of Science;  
13 2011;6:1–10.
- 14 71. Chow CN, Zheng HQ, Wu NY, Chien CH, Huang H Da, Lee TY, et al. PlantPAN 2.0: An update  
15 of Plant Promoter Analysis Navigator for reconstructing transcriptional regulatory networks in  
16 plants. Nucleic Acids Res. 2016;44:D1154–64.
- 17 72. Westermann AJ, Gorski SA, Vogel J. Dual RNA-seq of pathogen and host. Nat. Rev. Microbiol.  
18 Nature Publishing Group; 2012;10:618–30.
- 19 73. Enguita F, Costa M, Fusco-Almeida A, Mendes-Giannini M, Leitão A. Transcriptomic Crosstalk  
20 between Fungal Invasive Pathogens and Their Host Cells: Opportunities and Challenges for Next-  
21 Generation Sequencing Methods. J. Fungi. 2016;2:7.
- 22 74. Parra G, Bradnam K, Korf I. CEGMA: A pipeline to accurately annotate core genes in  
23 eukaryotic genomes. Bioinformatics. 2007;23:1061–7.
- 24 75. Ye W. Sequencing of the litchi downy blight pathogen reveals it is a *Phytophthora* species with  
25 downy mildew-like characteristics. Mol. Plant-Microbe Interact. 2015;29:573–83.
- 26 76. Hayden KJ, Garbelotto M, Knaus BJ, Cronn RC, Rai H, Wright JW. Dual RNA-seq of the plant  
27 pathogen *Phytophthora ramorum* and its tanoak host. Tree Genet. Genomes. 2014;10:489–502.
- 28 77. Meyer FE, Shuey LS, Naidoo S, Mamni T, Berger DK, Myburg AA, et al. Dual RNA-  
29 Sequencing of *Eucalyptus nitens* during *Phytophthora cinnamomi* Challenge Reveals Pathogen and  
30 Host Factors Influencing Compatibility. Front. Plant Sci. 2016;7:191.
- 31 78. O’Connell RJ, Thon MR, Hacquard S, Amyotte SG, Kleemann J, Torres MF, et al. Lifestyle  
32 transitions in plant pathogenic *Colletotrichum* fungi deciphered by genome and transcriptome  
33 analyses. Nat. Genet. Nature Publishing Group; 2012;44:1060–5.
- 34 79. Attard A, Evangelisti E, Kebdani-Minet N, Panabières F, Deleury E, Maggio C, et al.  
35 Transcriptome dynamics of *Arabidopsis thaliana* root penetration by the oomycete pathogen  
36 *Phytophthora parasitica*. BMC Genomics. BioMed Central; 2014;15:538.

- 1 80. Ye W, Wang X, Tao K, Lu Y, Dai T, Dong S, et al. Digital gene expression profiling of the  
2 *Phytophthora sojae* transcriptome. *Mol. Plant-Microbe Interact.* 2011;24:1530–9.
- 3 81. Windram O, Madhou P, McHattie S, Hill C, Hickman R, Cooke E, et al. *Arabidopsis* defense  
4 against *Botrytis cinerea*: chronology and regulation deciphered by high-resolution temporal  
5 transcriptomic analysis. *Plant Cell.* 2012;24:3530–57.
- 6 82. Shibata Y, Kawakita K, Takemoto D. Age-related resistance of *Nicotiana benthamiana* against  
7 hemibiotrophic pathogen *Phytophthora infestans* requires both ethylene- and salicylic acid-  
8 mediated signaling pathways. *Mol. Plant-Microbe Interact.* 2010;23:1130–42.
- 9 83. Eshraghi L, Anderson JP, Aryamanesh N, McComb J a, Shearer B, Hardy GSJE. Suppression of  
10 the auxin response pathway enhances susceptibility to *Phytophthora cinnamomi* while phosphite-  
11 mediated resistance stimulates the auxin signalling pathway. *BMC Plant Biol.* 2014;14:68.
- 12 84. Huang H, Qi SD, Qi F, Wu CA, Yang GD, Zheng CC. NtKTI1, a Kunitz trypsin inhibitor with  
13 antifungal activity from *Nicotiana tabacum*, plays an important role in tobacco's defense response.  
14 *FEBS J.* 2010;277:4076–88.
- 15 85. Vega K, Kalkum M. Chitin, chitinase responses, and invasive fungal infections. *Int. J.*  
16 *Microbiol.* 2012.
- 17 86. Li J, Brader G, Palva ET. Kunitz trypsin inhibitor: An antagonist of cell death triggered by  
18 phytopathogens and fumonisin B1 in *Arabidopsis*. *Mol. Plant.* 2008;1:482–95.
- 19 87. Shadle GL, Wesley SV, Korth KL, Chen F, Lamb C, Dixon RA. Phenylpropanoid compounds  
20 and disease resistance in transgenic tobacco with altered expression of L-phenylalanine ammonia-  
21 lyase. *Phytochemistry.* 2003;64:153–61.
- 22 88. Miedes E, Vanholme R, Boerjan W, Molina A. The role of the secondary cell wall in plant  
23 resistance to pathogens. *Front. Plant Sci.* 2014;5:358.
- 24 89. Tayeh C, Randoux B, Vincent D, Bourdon N, Reignault P. Exogenous trehalose induces  
25 defenses in wheat before and during a biotic stress caused by powdery mildew. *Phytopathology.*  
26 2014;104:293–305.
- 27 90. Luo Y, Li WM, Wang W. Trehalose: Protector of antioxidant enzymes or reactive oxygen  
28 species scavenger under heat stress? *Environ. Exp. Bot.* 2008;63:378–84.
- 29 91. Chávez-Moctezuma MP, Lozoya-Gloria E. Biosynthesis of the sesquiterpenic phytoalexin  
30 capsidiol in elicited root cultures of chili pepper (*Capsicum annuum*). *Plant Cell Rep.* 1996;15:360–  
31 6.
- 32 92. Egea C, Alcázar MD, Candela ME. Capsidiol: Its role in the resistance of *Capsicum annuum* to  
33 *Phytophthora capsici*. *Physiol. Plant.* 1996;98:737–42.
- 34 93. Ingram J, Bartels D. The Molecular Basis of Dehydration Tolerance in Plants. *Annu. Rev. Plant*  
35 *Physiol. Plant Mol. Biol.* 1996;47:377–403.

- 1 94. Candat A, Paszkiewicz G, Neveu M, Gautier R, Logan DC, Avelange-Macherel M-H, et al. The  
2 ubiquitous distribution of late embryogenesis abundant proteins across cell compartments in  
3 *Arabidopsis* offers tailored protection against abiotic stress. *Plant Cell*. 2014;26:3148–66.
- 4 95. Serrazina S, Santos C, Machado H, Pesquita C, Vicentini R, Pais MS, et al. Castanea root  
5 transcriptome in response to *Phytophthora cinnamomi* challenge. *Tree Genet. Genomes*. 2015;11:1–  
6 19.
- 7 96. Shen D, Chai C, Ma L, Zhang M, Dou D. Comparative RNA-Seq analysis of *Nicotiana*  
8 *benthamiana* in response to *Phytophthora parasitica* infection. *Plant Growth Regul.* Springer  
9 Netherlands; 2016;80:59–67.
- 10 97. Segretin ME, Pais M, Franceschetti M, Chaparro-Garcia A, Bos JIB, Banfield MJ, et al. Single  
11 amino acid mutations in the potato immune receptor R3a expand response to *Phytophthora*  
12 effectors. *Mol. Plant-Microbe Interact*. 2014;27:624–37.
- 13 98. Chapman S, Stevens LJ, Boevink PC, Engelhardt S, Alexander CJ, Harrower B, et al. Detection  
14 of the virulent Form of AVR3a from *Phytophthora infestans* following artificial evolution of potato  
15 resistance gene *R3a*. *PLoS One*. 2014;9.
- 16 99. Albert I, Böhm H, Albert M, Feiler CE, Imkampe J, Wallmeroth N, et al. An RLP23-SOBIR1-  
17 BAK1 complex mediates NLP-triggered immunity. *Nat. Plants*. Nature Publishing Group;  
18 2015;1:15140.
- 19 100. Bozkurt TO, Belhaj K, Dagdas YF, Chaparro-Garcia A, Wu CH, Cano LM, et al. Rerouting of  
20 Plant Late Endocytic Trafficking Toward a Pathogen Interface. *Traffic*. 2015;16:204–26.
- 21 101. Reeksting BJ, Olivier NA, van den Berg N. Transcriptome responses of an ungrafted  
22 *Phytophthora* root rot tolerant avocado (*Persea americana*) rootstock to flooding and *Phytophthora*  
23 *cinnamomi*. *BMC Plant Biol.* BMC Plant Biology; 2016;16:205.
- 24 102. Simon R, Dresselhaus T. Peptides take centre stage in plant signalling. *J. Exp. Bot*.  
25 2015;66:5135–8.
- 26 103. Vie AK, Najafi J, Liu B, Winge P, Butenko MA, Hornslien KS, et al. The IDA/IDA-LIKE and  
27 PIP/PIP-LIKE gene families in *Arabidopsis*: Phylogenetic relationship, expression patterns, and  
28 transcriptional effect of the PIPL3 peptide. *J. Exp. Bot*. 2015;66:5351–65.
- 29 104. Attard A, Gourgues M, Callemeyn-Torre N, Keller H. The immediate activation of defense  
30 responses in *Arabidopsis* roots is not sufficient to prevent *Phytophthora parasitica* infection. *New*  
31 *Phytol.* Wiley Online Library; 2010;187:449–60.
- 32 105. Sokal RR, Rohlf FJ. *Biometry: The Principles and Practices of Statistics in Biological*  
33 *Research*. W. H. Free. 1995.
- 34 106. You FM, Huo N, Gu YQ, Luo M-C, Ma Y, Hane D, et al. BatchPrimer3: a high throughput web  
35 application for PCR and sequencing primer design. *BMC Bioinformatics*. 2008;9:253.

- 1 107. Yan HZ, Liou RF. Selection of internal control genes for real-time quantitative RT-PCR assays  
2 in the oomycete plant pathogen *Phytophthora parasitica*. Fungal Genet. Biol. Elsevier;  
3 2006;43:430–8.
- 4 108. Liu D, Shi L, Han C, Yu J, Li D, Zhang Y. Validation of Reference Genes for Gene Expression  
5 Studies in Virus-Infected *Nicotiana benthamiana* Using Quantitative Real-Time PCR. PLoS One.  
6 2012;7.
- 7 109. Sparkes IA, Runions J, Kearns A, Hawes C. Rapid, transient expression of fluorescent fusion  
8 proteins in tobacco plants and generation of stably transformed plants. Nat. Protoc. 2006;1:2019–  
9 25.
- 10 110. Martin M. Cutadapt removes adapter sequences from high-throughput sequencing reads.  
11 EMBnet.journal. 2011;17:10–2.
- 12 111. Kim D, Pertea G, Trapnell C, Pimentel H, Kelley R, Salzberg SL. TopHat2: accurate alignment  
13 of transcriptomes in the presence of insertions, deletions and gene fusions. Genome Biol. BioMed  
14 Central Ltd; 2013;14:R36.
- 15 112. Emanuelsson O, Nielsen H, Brunak S, von Heijne G. Predicting subcellular localization of  
16 proteins based on their N-terminal amino acid sequence. J. Mol. Biol. 2000;300:1005–16.
- 17 113. Krogh A, Larsson B, von Heijne G, Sonnhammer EL. Predicting transmembrane protein  
18 topology with a hidden Markov model: application to complete genomes. J Mol Biol.  
19 2001;305:567–80.
- 20 114. Stornaiuolo. KDEL and KKXX Retrieval Signals Appended to the Same Reporter Protein  
21 Determine Different Trafficking between Endoplasmic Reticulum, Intermediate Compartment, and  
22 Golgi Complex. Mol. Biol. Cell. 2003;14:2372–84.
- 23 115. Zdobnov EM, Apweiler R. InterProScan - an integration platform for the signature-recognition  
24 methods in InterPro. Bioinformatics. 2001;17:847–8.
- 25 116. Nguyen Ba AN, Pogoutse A, Provart N, Moses AM. NLStradamus: a simple Hidden Markov  
26 Model for nuclear localization signal prediction. BMC Bioinformatics. BioMed Central;  
27 2009;10:202.
- 28 117. Cokol M, Nair R, Rost B. Finding nuclear localization signals. EMBO Rep. 2000;1:411–5.
- 29 118. Li B, Dewey CN. RSEM: accurate transcript quantification from RNA-Seq data with or  
30 without a reference genome. BMC Bioinformatics. 2011;12:323.
- 31 119. Robinson MD, Oshlack A. A scaling normalization method for differential expression analysis  
32 of RNA-seq data. Genome Biol. 2010;11:R25.
- 33 120. Wickham H. ggplot2 Elegant Graphics for Data Analysis. Media. 2009.
- 34 121. Raivo K. pheatmap: Pretty Heatmaps. 2013.
- 35 122. Swinton J. Venn diagrams in R with the Vennerable package [Internet]. 2013. Available from:  
36 <https://github.com/js229/Vennerable>

- 1 123. Maechler M, Rousseeuw P, Struyf A, Hubert M, Hornik K. Cluster Analysis Basics and  
2 Extensions. R package version 2.0.5. Cran. 2016.
- 3 124. Huber W, Carey VJ, Gentleman R, Anders S, Carlson M, Carvalho BS, et al. Orchestrating  
4 high-throughput genomic analysis with Bioconductor. Nat Methods. Nature Publishing Group;  
5 2015;12:115–21.
- 6 125. Adrian Alexa and Jorg Rahnenfuhrer. topGO: Enrichment analysis for Gene Ontology. 2010.
- 7 126. Supek F, Bošnjak M, Škunca N, Šmuc T. Revigo summarizes and visualizes long lists of gene  
8 ontology terms. PLoS One. 2011;6.

## 9 Figure Legends

10 **Figure 1 – *Phytophthora palmivora* exerts a hemibiotrophic lifestyle in *Nicotiana benthamiana***  
11 **roots. (a)** Representative pictures of root-infected plantlets during *P. palmivora* infection, showing  
12 disease progression on the aboveground tissues. The successive symptom extent stages (SES) were  
13 used to define a disease index in order to quantitate disease progression over time. **(b-h)**  
14 Microscopic analysis of *N. benthamiana* roots inoculated with transgenic *P. palmivora* LILI  
15 expressing an endoplasmic reticulum (ER)-targeted YFP. Pictures were taken during penetration **(b,**  
16 3 hours after inoculation (hai)), early infection **(c, 6 hai)**, biotrophy **(d, 18 hai and e, 24 hai)**, switch  
17 to necrotrophy **(f, 30 hai)** and necrotrophy **(g, 48 hai and h, 72 hai respectively)**. Each pane shows  
18 transmission light (Transmission) and merged YFP fluorescence with propidium iodide (PI) staining  
19 (YFP + PI). Hy, hypha; Ve, vesicle; Cy: cyst; Ha: haustorium. Scale bar is 10 µm. **(i)** Quantification  
20 of *P. palmivora* biomass accumulation over time in *N. benthamiana* roots was measured by  
21 expression of *P. palmivora* *WS21* relative to *N. benthamiana* *L23* and *F-box* reference genes. **(j, k)**  
22 Expression of *P. palmivora* lifestyle marker genes *Hmp1* (k) and *Cdc14* (l) were measured over time  
23 relative to *P. palmivora* *WS21* and *OPEL* reference genes. Quantitative RT-PCR experiments were  
24 performed in triplicate. Dots represent values for each replicate. Bars represent the mean value.  
25 Statistical significance has been assessed using one-way ANOVA and Tukey's HSD test ( $P < 0.05$ ).



1 **Figure 2 – Overview of *P. palmivora* sequencing data analysis workflows. (a)** Selection of *P.*  
2 *palmivora* reads from mixed samples and *de novo* assembly of transcriptome. **(b)** Secretome  
3 prediction. **(c)** Pipeline for automated secretome annotation. Final product of each pipeline are  
4 highlighted by bold lines. Abbreviations: SP: signal peptide; NLS: nuclear localization signal; CRN:  
5 crinkler.

6 **Figure 3 – *N. benthamiana* and *P. palmivora* transcriptomes show different temporal dynamics**  
7 **during interaction. (a-b)** PCA clustering of full transcriptional profiles of *N. benthamiana* **(a)** and  
8 *P. palmivora* **(b)**. **(c-d)** Venn diagrams show shared genes expressed in groups identified by PCA  
9 analysis for *N. benthamiana* **(c)** and *P. palmivora* **(d)**. Genes with  $\text{TPM} \geq 5$  were considered to be  
10 expressed. **(e-f)** Hierarchical clustering of major classes of differentially expressed genes ( $p\text{-value} <$   
11  $10^{-3}$ ,  $\text{LFC} \geq 2$ ) in *N. benthamiana* **(e)** and *P. palmivora* **(f)** transcriptomes. Relative expression  
12 levels of each transcript (rows) in each sample (column) are shown. TPMs were log2-transformed  
13 and then median-centered by transcript. Plant samples were centered according to the full set of  
14 mock and infected samples, only infected samples are shown. Abbreviation: MZ: axenically grown  
15 mycelium with sporangia.

16 **Figure 4 – Temporal dynamics of *P. palmivora* differentially expressed genes (DEGs) during**  
17 **infection time course.** Fuzzy clustering was performed on *P. palmivora* DEGs. Only genes with  
18 cluster membership values  $\geq 0.7$  are shown, *i.e.* alpha cores **(a)**. Functional distribution of secreted  
19 proteins for the grouped clusters is shown in **(b)**. Abbreviations: RXLR: RXLR-effector; SCR:  
20 small cysteine-rich protein; CWDE: cell wall degrading enzyme; NLP: necrosis inducing protein;

1 EPI: protease inhibitor; Other: other genes encoding proteins predicted to be secreted without  
2 specific functional category assigned.

3 **Figure 5 – Spatial distribution of REX effectors in *N. benthamiana* roots. (a-d)** Transgenic *N.*  
4 *benthamiana* plants expressing GFP:FLAG-REX fusion proteins were regenerated from leaf  
5 explants and grown to seeds. Subcellular localisation of GFP:FLAG-REX1-4 was assessed on  
6 seedling roots stained with propidium iodide (PI). GFP:FLAG-REX1 **(a)**, GFP:FLAG-REX2 **(b)**  
7 and GFP:FLAG-REX4 **(d)** accumulated in the cytoplasm and in the nucleus. GFP:FLAG-REX3 **(c)**  
8 was detected in the cytoplasm but was excluded from the nucleus. Scale bar is 10  $\mu$ m.

9 **Figure 6 – REX2 and REX3 increase *N. benthamiana* susceptibility to *P. palmivora* and REX3**  
10 **interferes with host secretion.** Transgenic *N. benthamiana* plants expressing GFP16c (control) or  
11 GFP:FLAG-REX1 to GFP:FLAG-REX4 were challenged with zoospores from *P. palmivora*  
12 YKDEL and disease progression was ranked over time using the previously defined symptom  
13 extent stages (SES). **(a)** Representative disease progression curves for transgenic plants expressing  
14 GFP:FLAG-REX1 (yellow), GFP:FLAG-REX2 (blue), GFP:FLAG-REX3 (green) or GFP:FLAG-  
15 REX4 (magenta), when compared to GFP16c control plants (red dashed). P-values were determined  
16 based on Scheirer–Ray–Hare nonparametric two-way analysis of variance (ANOVA) for ranked  
17 data. The experiment was carried out in duplicate (N = 22 plants). **(b)** Representative pictures of  
18 infected plants, 8 days after infection. **(c)** Disease-promoting effectors REX2 and REX3 were  
19 coexpressed with a secreted GFP construct (SP<sub>PR1</sub>-GFP) in *N. benthamiana* leaves. GFP  
20 fluorescence was quantified along the nucleus.



**Figure 7 – The promoter of a gene encoding the secreted peptide TIPTOP is upregulated during early biotrophy in *N. benthamiana* roots.** (a) Representative pictures of GUS stained whole root systems of *N. benthamiana* transgenics carrying TIPTOP<sub>pro</sub>::GFP:GUS, non infected or 16 hours after infection with *P. palmivora* LILI-tdTomato. Stars represent unstained root tips. Arrowheads represent stained root tips. (b) Representative pictures of infected root tips after GUS staining, showing GUS signal at the vicinity of infection sites (top pane). Uninfected root tips from the same plant do not show any staining (bottom pane). Scale bar is 25 µm. (c) Representative pictures of GFP signal at the root tip of infected *N. benthamiana* transgenics expressing GFP:GUS fusion under the control of TIPTOP promoter.

## Supporting information

**Figure S1** – BUSCO genes missing from available *Phytophthora* genomes and transcriptomes.

**Figure S2** – Amino acid sequence alignment of PLTG\_13552 and *P. infestans* AVR3a<sup>EM</sup>.

**Figure S3** – Number of DEGs between infection time points.

**Figure S4** – Validation of dynamic behavior of *P. palmivora* DEGs by qRT-PCR.

**Figure S5** – PCR detection of REX1-4 effectors in *P. palmivora* isolates.

**Figure S6** – Amino acid sequence logos for REX1-4 effectors.

**Figure S7** – Habitus of *N. benthamiana* transgenics used in this study.

**Figure S8** – Subcellular localisation of GFP:REX1-4 proteins in *N. benthamiana* leaves.

**Figure S9** – Structure of pTrafficLights construct and secretion inhibition assays.

**Figure S10** – Validation of *N. benthamiana* DEGs by qRT-PCR.

**Figure S11** – Amino acid sequence alignment of TIPTOP and similar *N. benthamiana* sequences with *A. thaliana* prePIPL1, prePIP1 and prePIP2.

**Figure S12** – Induction of TIPTOP promoter in response to biotic and abiotic stresses.

- 1 **Table S1** – Sequencing and mapping statistics in RNA-seq samples containing *P. palmivora*
- 2 **Table S2** – BUSCO genes missing from genomes and transcriptomes of *Phytophthora* genus.
- 3 BUSCO genes were Annotated using InterProScan based on sequences emitted from HMM
- 4 profiles.
- 5 **Table S3** – Primers used in this study
- 6 **Table S4** – *P. palmivora* isolates
- 7 **Table S5** – PlantPAN analysis of TIPTOP promoter sequence
- 8 **Supplementary Dataset 1 - *P. palmivora* de novo transcriptome assembly.** Assembly was
- 9 performed using trinity 2.1.1 software. CDS and corresponding mRNA and amino acid sequences
- 10 were predicted using Transdecoder with additional homology-based filters.
- 11 Tar archive contains 4 files:
- 12 LILI\_transcriptome\_v5\_converted.fasta - final version of *P. palmivora* transcriptome
- 13 LILI\_transcriptome\_v5.transdecoder.cds.fasta - Transdecoder-predicted CDS
- 14 LILI\_transcriptome\_v5.transdecoder.mRNA.fasta - mRNAs for predicted CDS
- 15 LILI\_transcriptome\_v5.transdecoder.pep.fasta - amino acid sequences
- 16 **Supplementary Dataset 2 - *N. benthamiana* expression table.** Raw counts were normalised
- 17 within and between samples. TMM-normalised TPMs were reported. Functional annotation
- 18 provided with 1.01 version of *N. benthamiana* genome was used:
- 19 ([ftp://ftp.solgenomics.net/genomes/Nicotiana\\_benthamiana/annotation/Niben101/](ftp://ftp.solgenomics.net/genomes/Nicotiana_benthamiana/annotation/Niben101/)).
- 20 **Supplementary Dataset 3 - *P. palmivora* expression table.** Raw counts were normalised within
- 21 and between samples. TMM-normalised TPMs were reported. Not manually curated high
- 22 throughput annotation (as described in Material and Methods) is provided.

- 1 **Supplementary Dataset 4 - GO-enrichment for *N. benthamiana* genes up and downregulated**
- 2 **during *P. palmivora* infection.** GO-enrichment was done with TopGO Bioconductor package.
- 3 Classic Fisher test was used, only GO-terms with p-value < 0.05 reported.
- 4 **Supplementary Dataset 5 - Manually curated *P. palmivora* secretome.**

**Figure 1**

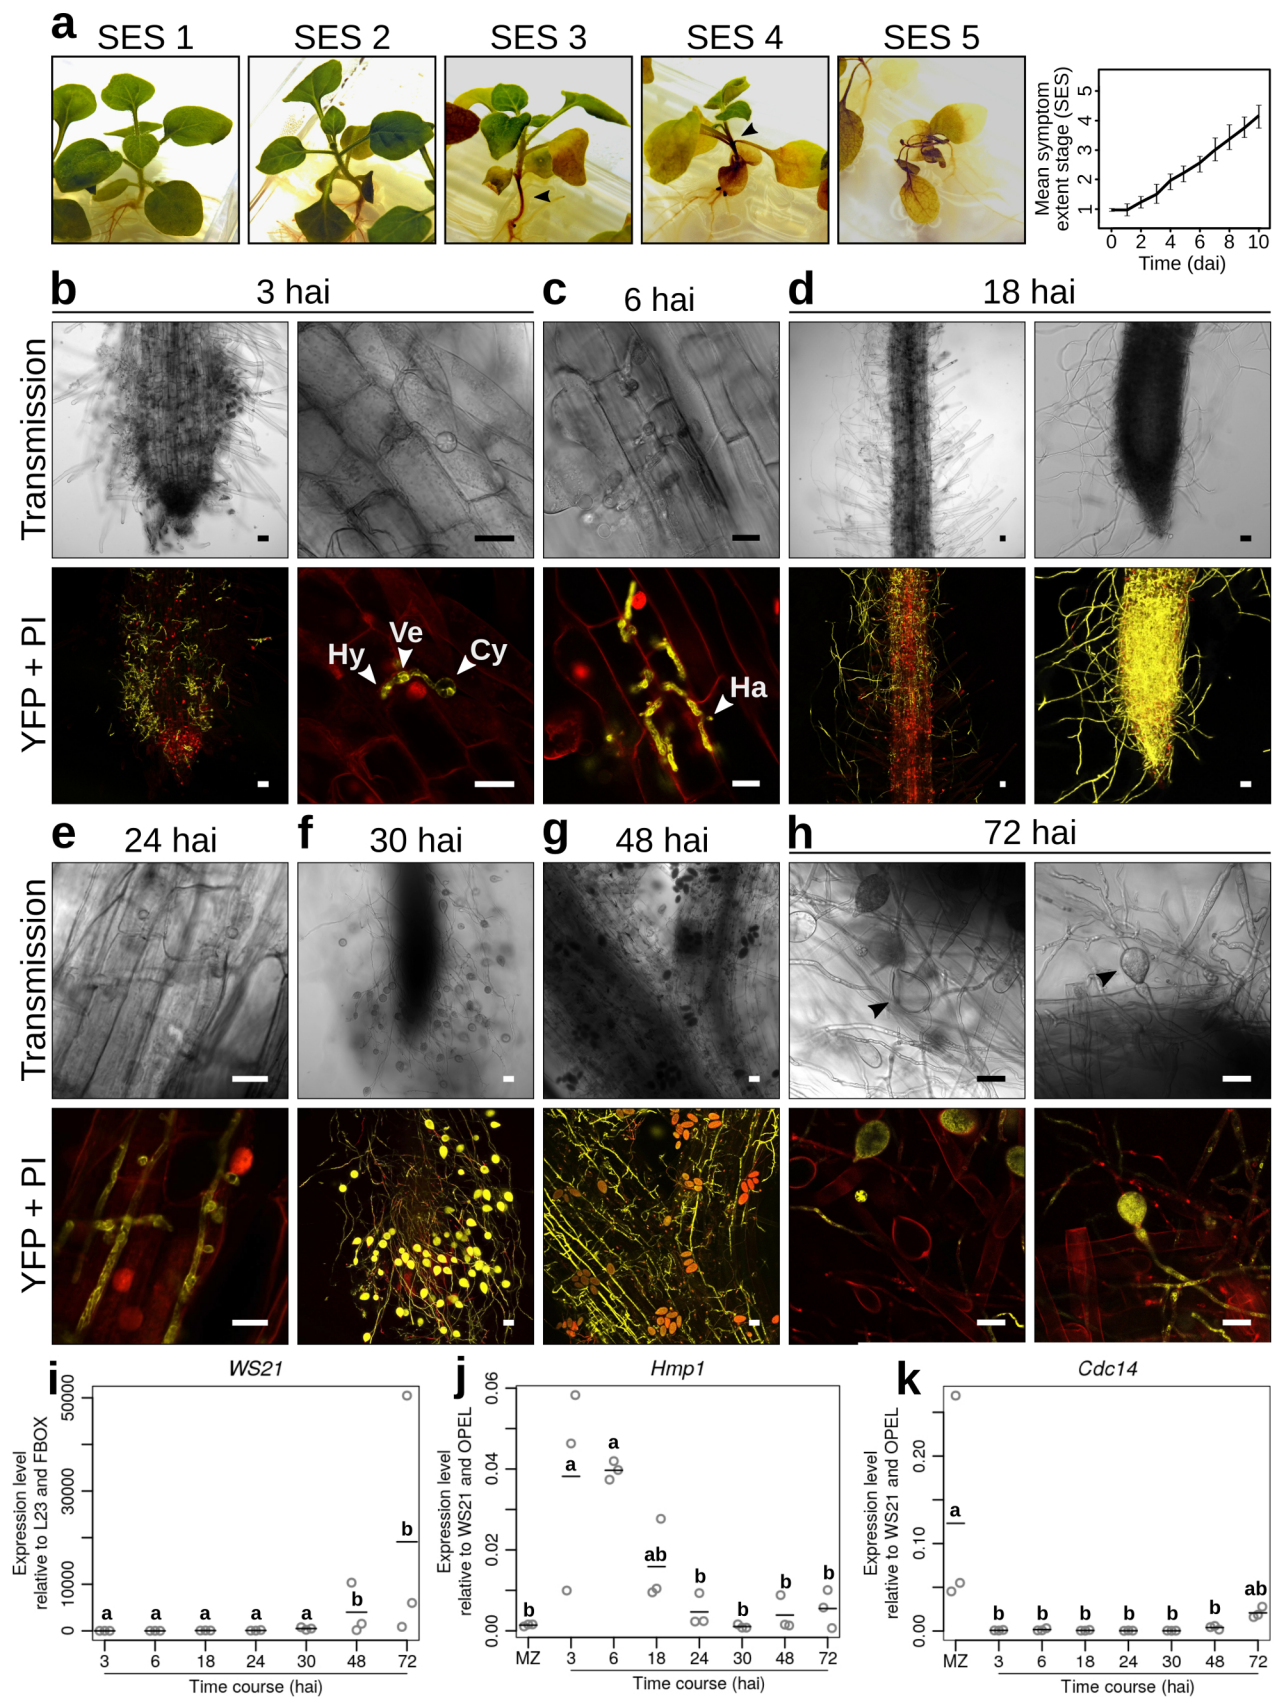

**Figure 2**

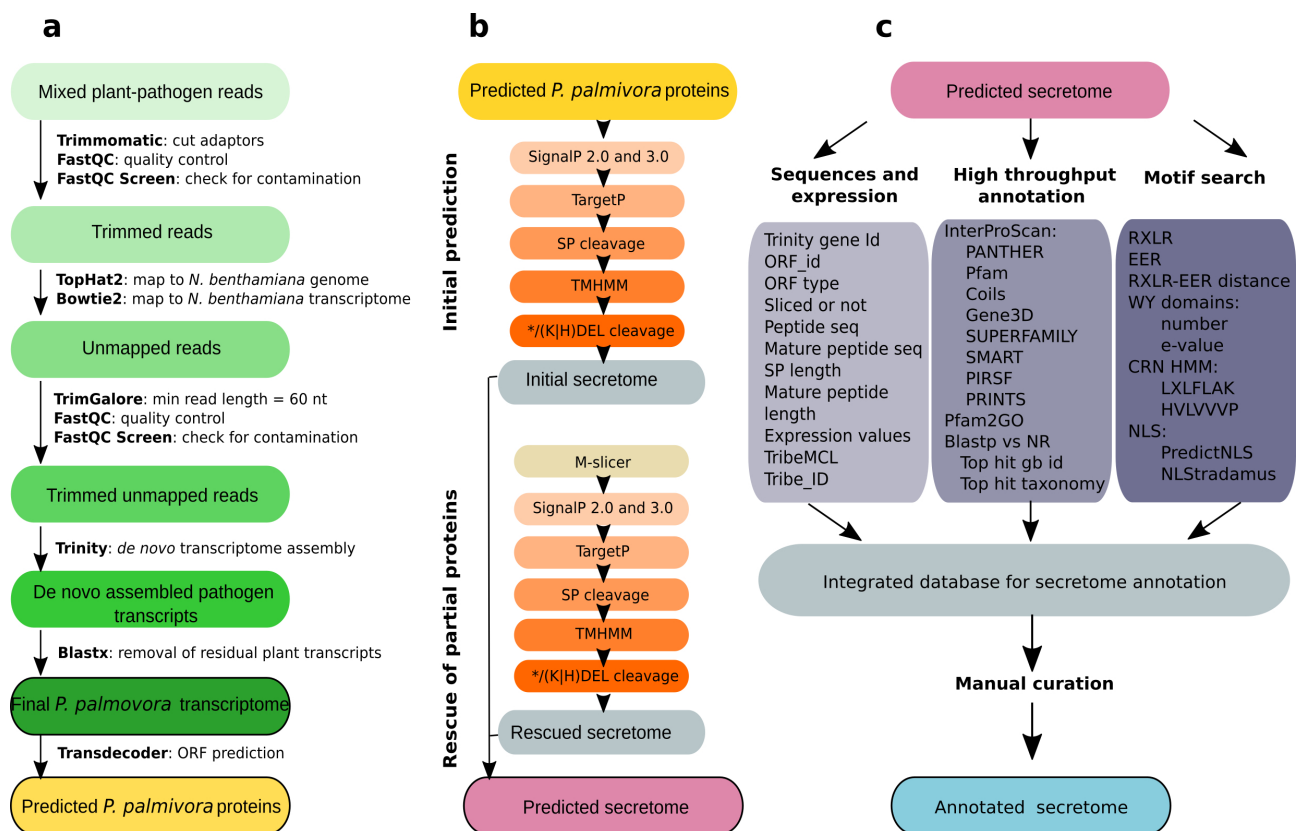

**Figure 3**

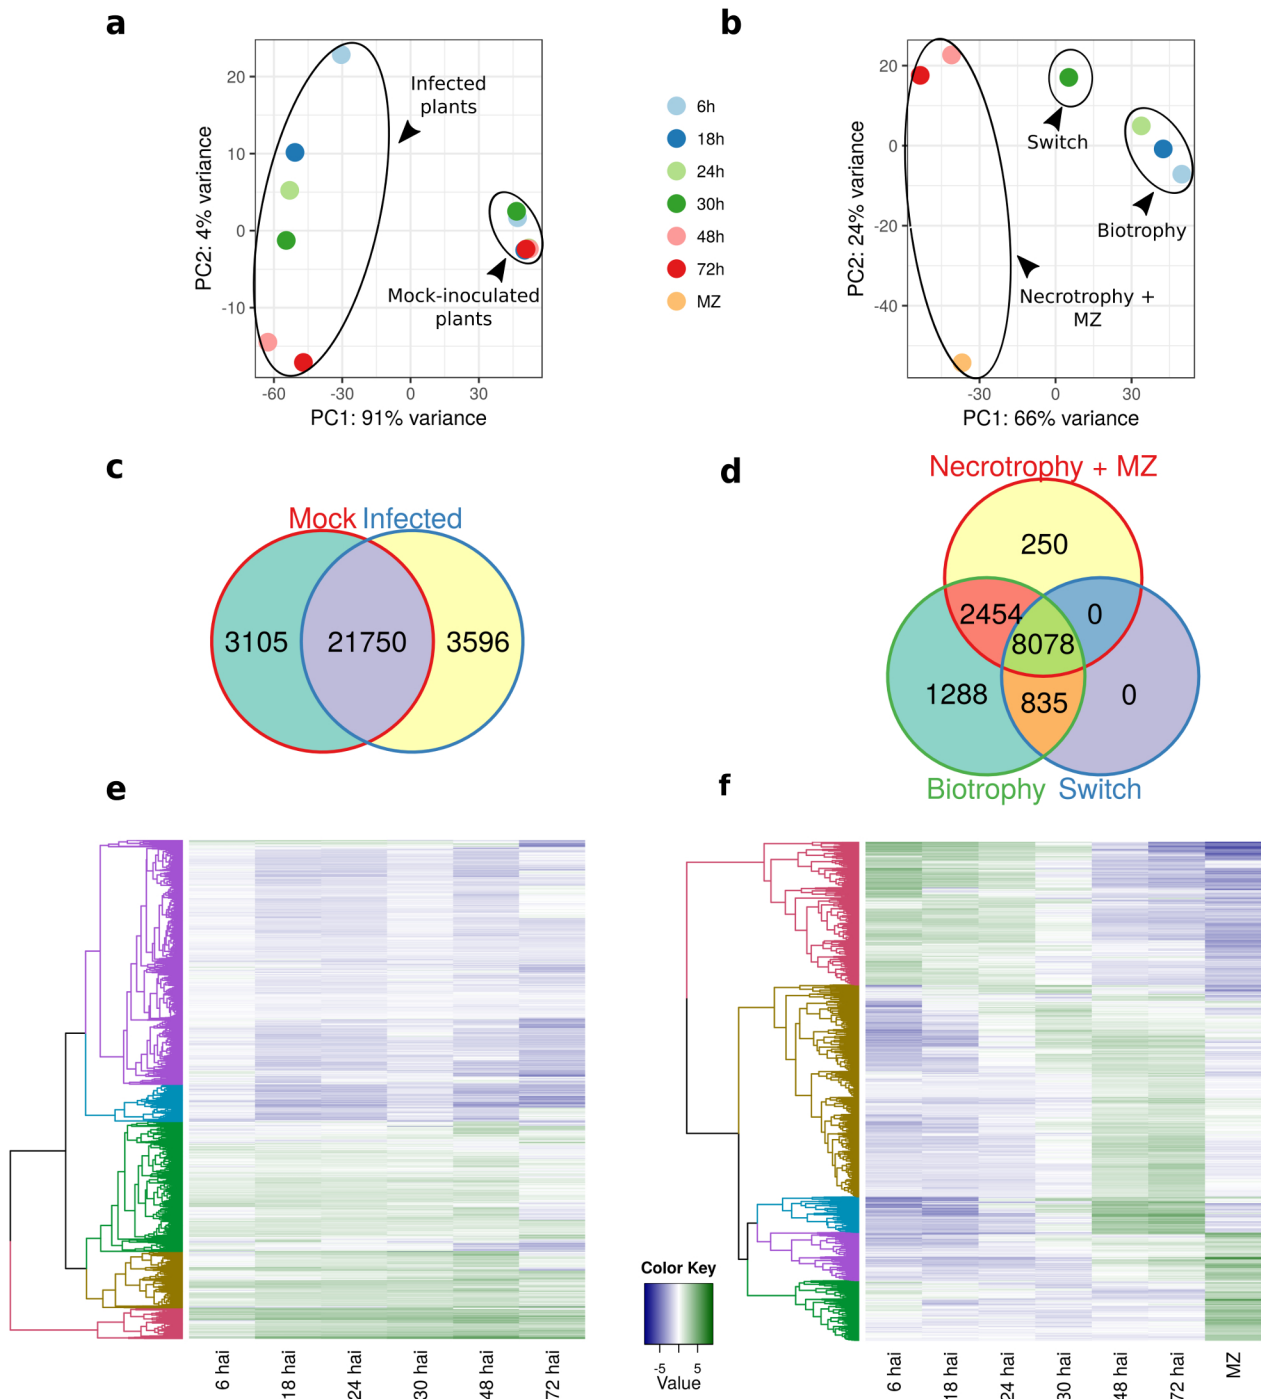



**Figure 4**

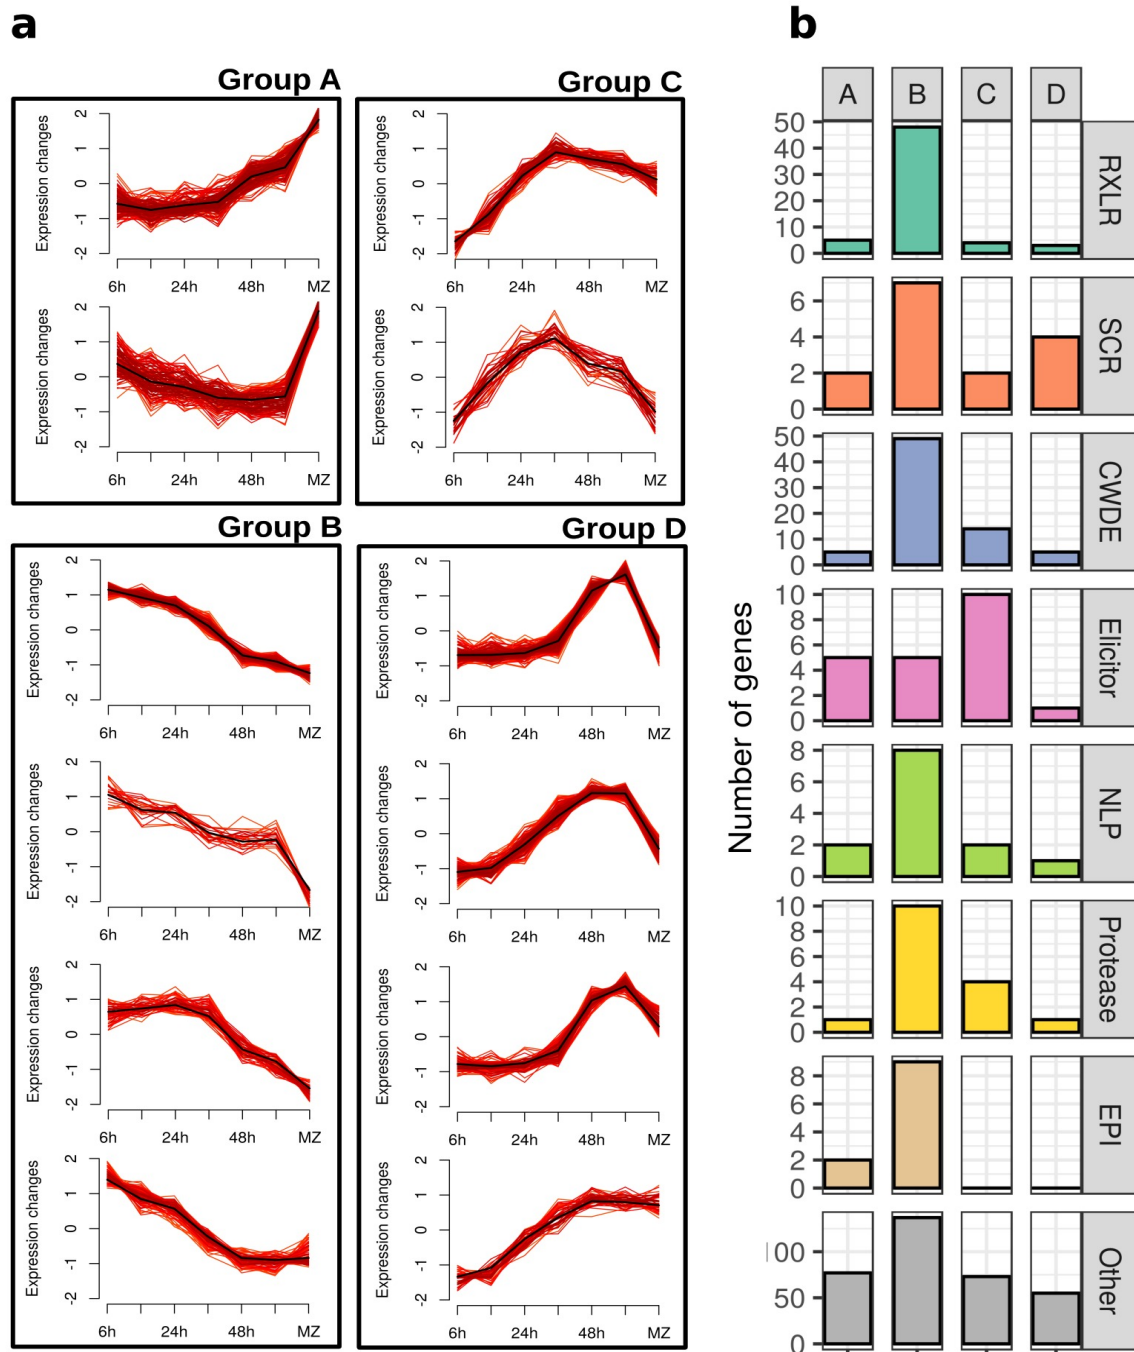

**Figure 5**

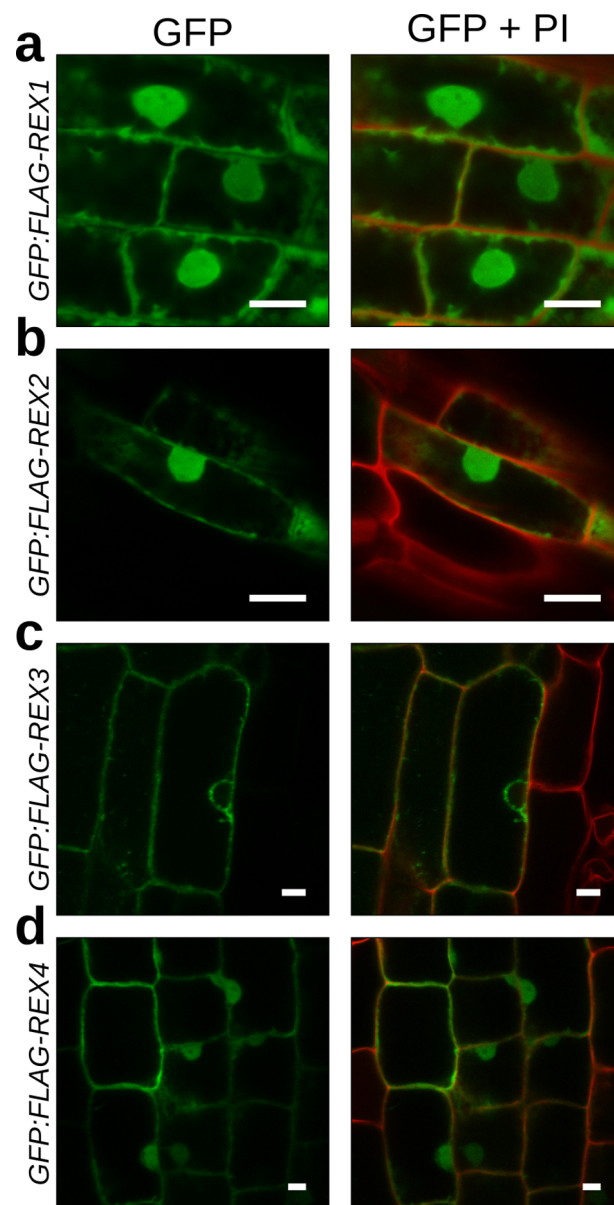



**Figure 6**

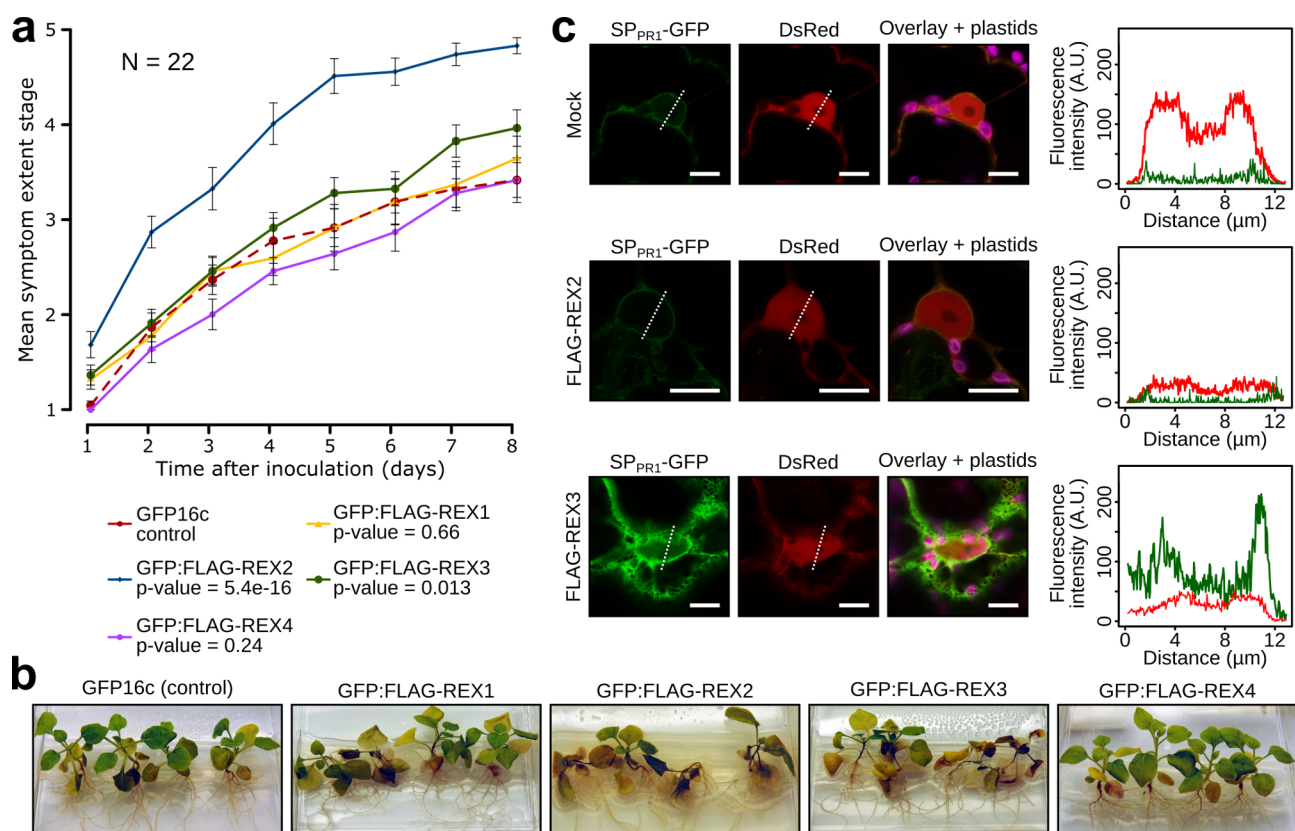

**Figure 7**

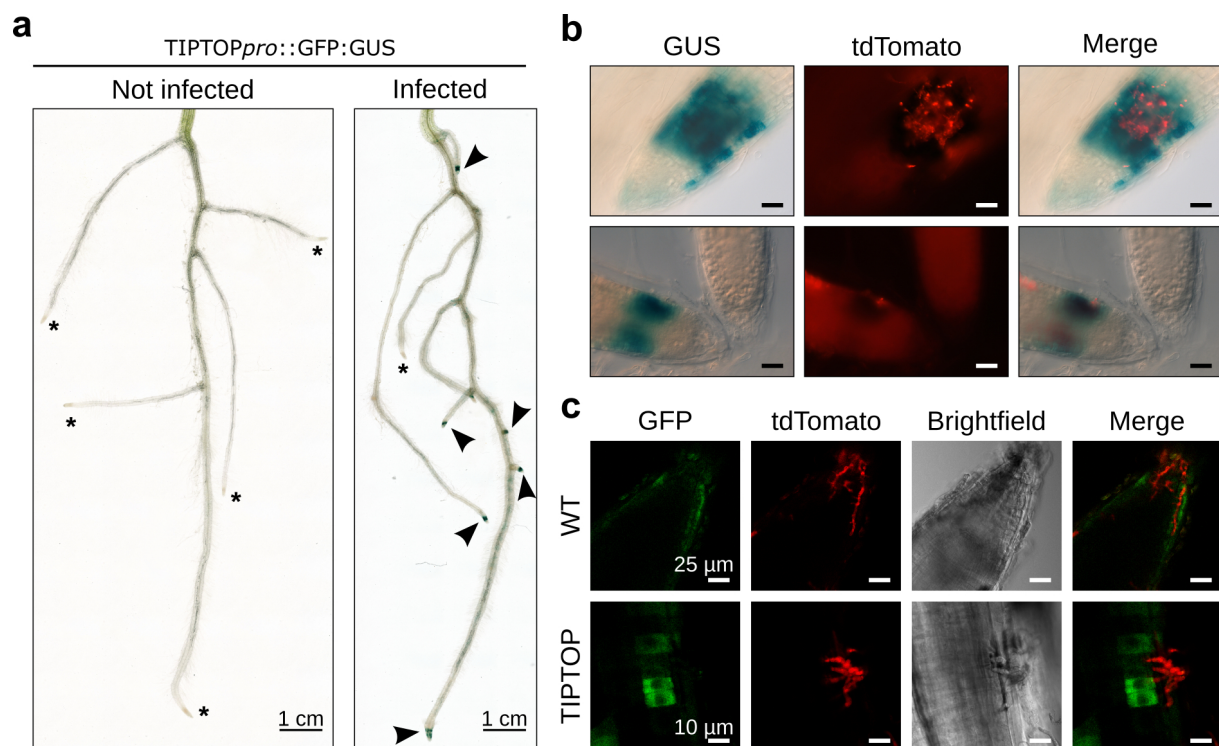

Source: https://www.biorxiv.org/content/10.1101/098855v1.full.pdf
